# Supplementary material
Source: ML conference proceedings conference paper supplement (https://proceedings.neurips.cc/paper_files/paper/2020/hash/b704ea2c39778f07c617f6b7ce480e9e-Abstract.html)
Supplement: Supplementary file [file b704ea2c39778f07c617f6b7ce480e9e-Supplemental.zip]

---

# Dark Experience for General Continual Learning: a Strong, Simple Baseline - Supplementary Material -

---

Pietro Buzzega   Matteo Boschini   Angelo Porrello   Davide Abati   Simone Calderara

AImageLab - University of Modena and Reggio Emilia, Modena, Italy  
name.surname@unimore.it

## A Justification of Table 1

Below we provide a justification for each mark of Table 1:

### A.1 Constant Memory

- *Distillation methods* need to accommodate a teacher model along with the current learner, at a fixed memory cost. While iCaRL maintains a snapshot of the network as teacher, LWF stores teacher responses to new task data at the beginning of each task.
- *Rehearsal methods* need to store a memory buffer of a fixed size. This also affects iCaRL.
- *Architectural methods* increase the model size linearly with respect to the number of tasks. In more detail, PackNet and HAT need a Boolean and float mask respectively, while PNN devotes a whole new network to each task.
- *Regularization methods* usually require to store up to two parameters sets, thus respecting the constant memory constraint.

### A.2 No Task Boundaries

- *Distillation methods* depend on task boundaries to appoint a new teacher. iCaRL also depends on them to update its memory buffer, in accordance with the *herding* sampling strategy.
- *Architectural methods* require to know exactly when the task finishes to update the model. PackNet also re-trains the network at this time.
- *Regularization methods* exploit the task change to take a snapshot of the network, using it to constrain drastic changes for the most important weights (oEWC, SI). Online EWC also needs to pass over the whole training set to compute the weights importance.
- *Rehearsal methods* can operate in the absence of task boundaries if their memory buffer exploits to the *reservoir* sampling strategy. This applies to ER, GSS, MER, DER and DER++ and can easily be extended to A-GEM (by replacing *ring* sampling with *reservoir* as discussed in Sec. 4.3). Other rehearsal approaches, however, rely on boundaries to perform specific steps: HAL hallucinates new anchors that synthesize the task it just completed, whereas FDR needs them to record converged logits to replay.

GEM does not strictly depend on task boundaries, but rather on task identities to associate every memorized input with its original task (as described in Sec. 3 of [7]). This is meant to let GEM set up a separate QP for each past task (notice that this is instead unnecessary for A-GEM, which only solves one generic constraint w.r.t. the average gradient of all buffer items). We acknowledge

that reliance on task boundaries and reliance on task identities are *logically equivalent*: indeed, i) the availability of task identities straightforwardly allows any method to recognize and exploit task boundaries; ii) *vice versa*, by relying on task boundaries and maintaining a task counter, one can easily associate task identities to incoming input points (under the assumption that tasks are always shown in a sequence without repetitions). This explains why Table 1 indicates that GEM depends on task boundaries. This is also in line with what argued by the authors of [1].

### A.3 No test time oracle

- *Architectural methods* need to know the task label to modify the model accordingly before they make any prediction.
- LWF is designed as a multi-head method, which means that its prediction head must be chosen in accordance with the task label.
- *Regularization methods*, *rehearsal methods* and iCaRL can perform inference with no information about the task.

## B Details on the Implementation of MNIST-360

MNIST-360 presents the evaluated method with a sequence of MNIST digits from 0 to 8 shown at increasing angles.

### B.1 Training

For Training purposes, we build batches using exemplars that belong to two consequent classes at a time, meaning that 9 pairs of classes are possibly encountered: (0, 1), (1, 2), (2, 3), (3, 4), (4, 5), (5, 6), (6, 7), (7, 8), and (8, 0). Each pair is shown in this order in  $R$  rounds ( $R = 3$  in our experiments) at changing rotations. This means that MNIST-360 consists of  $9 \cdot R$  pseudo-tasks, whose boundaries are not signaled to the tested method. We indicate them with  $\Psi_r^{(d_1, d_2)}$  where  $r \in \{1, \dots, R\}$  is the round number and  $d_1, d_2$  are digits forming one of the pairs listed above.

As every MNIST digit  $d$  appears in  $2 \cdot R$  pseudo-tasks, we randomly split its example images evenly in 6 groups  $G_i^d$  where  $i \in \{1, \dots, 2 \cdot R\}$ . The set of exemplars that are shown in  $\Psi_r^{(d_1, d_2)}$  is given as  $G_{[r/2]}^{d_1} \cup G_{[r/2]+1}^{d_2}$ , where  $[r/2]$  is an integer division.

At the beginning of  $\Psi_r^{(d_1, d_2)}$ , we initialize two counters  $C_{d_1}$  and  $C_{d_2}$  to keep track of how many exemplars of  $d_1$  and  $d_2$  are shown respectively. Given batch size  $B$  ( $B = 16$  in our experiments), each batch is made up of  $N_{d_1}$  samples from  $G_{[r/2]}^{d_1}$  and  $N_{d_2}$  samples from  $G_{[r/2]+1}^{d_2}$ , where:

$$N_{d_1} = \min \left( \frac{|G_{[r/2]}^{d_1}| - C_{d_1}}{|G_{[r/2]}^{d_1}| - C_{d_1} + |G_{[r/2]+1}^{d_2}| - C_{d_2}} \cdot B, |G_{[r/2]}^{d_1}| - C_{d_1} \right) \quad (7)$$

$$N_{d_2} = \min \left( B - N_{d_1}, |G_{[r/2]+1}^{d_2}| - C_{d_2} \right) \quad (8)$$

This allows us to produce balanced batches, in which the proportion of exemplars of  $d_1$  and  $d_2$  is maintained the same. Pseudo-task  $\Psi_r^{(d_1, d_2)}$  ends when the entirety of  $G_{[r/2]}^{d_1} \cup G_{[r/2]+1}^{d_2}$  has been shown, which does not necessarily happen after a fixed number of batches.

Each digit  $d$  is also associated with a counter  $C_d^r$  that is never reset during training and is increased every time an exemplar of  $d$  is shown to the evaluated method. Before its showing, every exemplar is rotated by

$$\frac{2\pi}{|d|} C_d^r + O_d \quad (9)$$

where  $|d|$  is the number of total examples of digit  $d$  in the training set and  $O_d$  is a digit-specific angular offset, whose value for the  $i$ th digit is given by  $O_i = (i - 1) \frac{\pi}{2 \cdot R}$  ( $O_0 = -\frac{\pi}{2 \cdot R}$ ,  $O_1 = 0$ ,  $O_2 = \frac{\pi}{2 \cdot R}$ , etc.). By so doing, every digit's exemplars are shown with an increasing rotation spanning an entire  $2\pi$  angle throughout the entire procedure. Rotation changes within each pseudo-task, resulting into a gradually changing distribution. Fig. 1 in the main paper shows the first batch of the initial 11 pseudo-tasks with  $B = 9$ .

## B.2 Test

As no task boundaries are provided, evaluation on MNIST-360 can only be carried out after the training is complete. For test purposes, digits are still shown with an increasing rotation as per Eq. 9, with  $|d|$  referring to the test-set digit cardinality and no offset applied ( $O_d = 0$ ).

The order with which digits are shown is irrelevant, therefore no specific batching strategy is necessary and we simply show one digit at a time.

## C Accuracy vs. Memory Occupation

In Fig. 3, we show how the accuracy results for the experiments in Section 4.2 and F.1 relate to the total memory usage of the evaluated methods. We maintain that having a reduced memory footprint is especially important for a CL method. This is usually fairly easy to assess for rehearsal-based methods, as they clearly specify the number of items that must be saved in the memory buffer. While this could lead to the belief that they have higher memory requirements than other classes of solutions [4], it should be noted that architectural, distillation- and regularization-based methods can instead be characterized by non-negligible fixed overheads, making them less efficient and harder to scale.

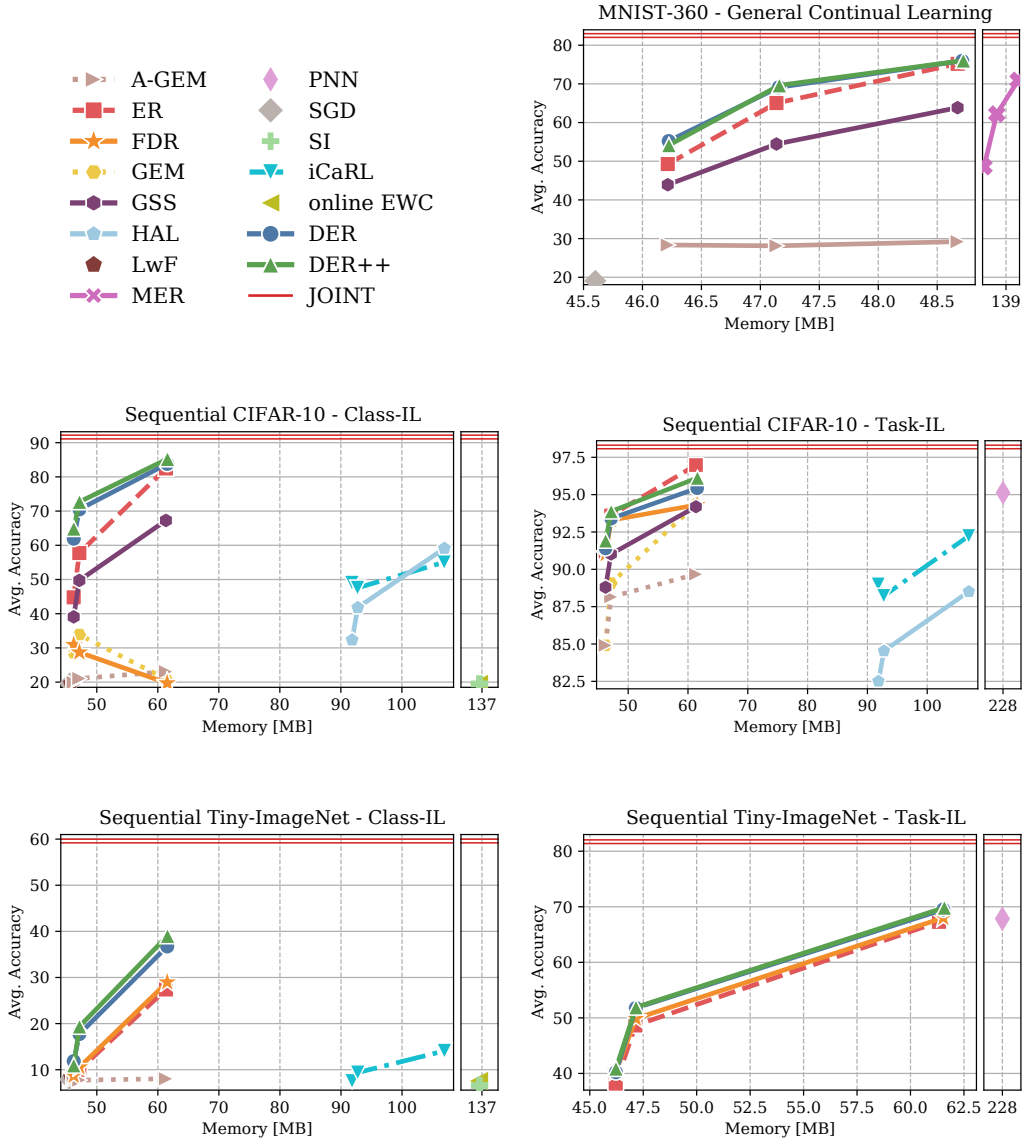

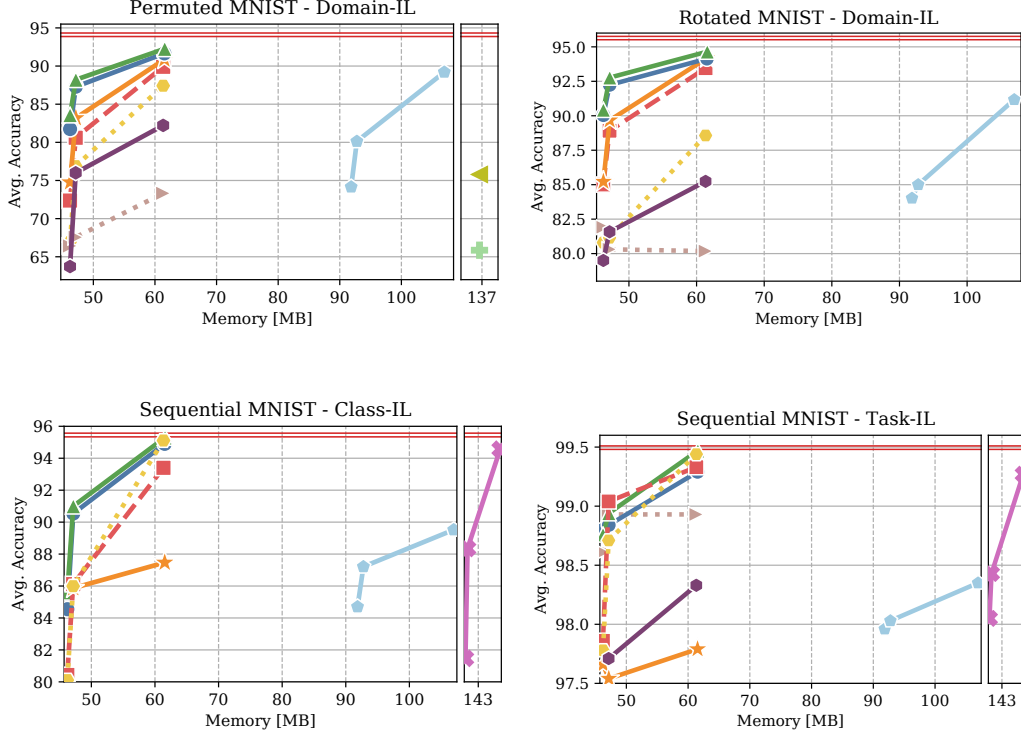

Figure 3: Performance vs. memory allocation for the experiments of Section 4 and F.1. Successive points of the same method indicate increasing buffer size. Methods with lower accuracy or excessive memory consumption may be omitted (*best viewed in color*).

## D Reservoir Sampling Algorithm

In the following, we provide the buffer insertion algorithm (3) for the Reservoir Sampling strategy [9].

---

### Algorithm 3 - Reservoir Sampling

---

**Input:** memory buffer  $\mathcal{M}$ , number of seen examples  $N$ , example  $x$ , label  $y$ .

```

if  $\mathcal{M} > N$  then
   $\mathcal{M}[N] \leftarrow (x, y)$ 
else
   $j = \text{randomInteger}(\text{min} = 0, \text{max} = N)$ 
  if  $j < |\mathcal{M}|$  then
     $\mathcal{M}[j] \leftarrow (x, y)$ 
  end if
end if
return  $\mathcal{M}$ 

```

---

## E Details on the Implementation of iCaRL

Although iCaRL [8] was initially proposed for the Class-IL setting, we make it possible to use it for Task-IL as well by introducing a modification of its classification rule. Let  $\mu_y$  be the average feature vector of the exemplars for class  $y$  and  $\phi(x)$  be the feature vector computed on example  $x$ , iCaRL predicts a label  $y^*$  as

$$y^* = \underset{y=1, \dots, t}{\operatorname{argmin}} \|\phi(x) - \mu_y\|. \quad (10)$$

Instead, given the tensor of average feature vectors for all classes  $\mu$ , we formulate iCaRL’s network response  $h(x)$  as

$$h(x) = -\|\phi(x) - \mu\|. \quad (11)$$

Considering the argmax for  $h(x)$ , without masking (Class-IL setting), results in the same prediction as Eq. 10.

It is also worth noting that iCaRL exploits a weight-decay regularization term ( $wd\_reg$ ), as suggested in [8], in order to make its performance competitive with the other proposed approaches.

## F Additional Results

### F.1 Sequential-MNIST

Similarly to Sequential CIFAR-10, the Sequential MNIST protocol split the whole training set of the MNIST Digits dataset in 5 tasks, each of which introduces two new digits.

| Model               | Class-IL                           |                                    |                                    | Task-IL                            |                                    |                                    |
|---------------------|------------------------------------|------------------------------------|------------------------------------|------------------------------------|------------------------------------|------------------------------------|
| JOINT               | $95.57 \pm 0.24$                   |                                    |                                    | $99.51 \pm 0.07$                   |                                    |                                    |
| SGD                 | $19.60 \pm 0.04$                   |                                    |                                    | $94.94 \pm 2.18$                   |                                    |                                    |
| oEWC                | <b><math>20.46 \pm 1.01</math></b> |                                    |                                    | $98.39 \pm 0.48$                   |                                    |                                    |
| SI                  | $19.27 \pm 0.30$                   |                                    |                                    | $96.00 \pm 2.04$                   |                                    |                                    |
| LwF                 | $19.62 \pm 0.01$                   |                                    |                                    | $94.11 \pm 3.01$                   |                                    |                                    |
| PNN                 | -                                  |                                    |                                    | <b><math>99.23 \pm 0.20</math></b> |                                    |                                    |
| Buffer              | 200                                | 500                                | 5120                               | 200                                | 500                                | 5120                               |
| ER                  | $80.43 \pm 1.89$                   | $86.12 \pm 1.89$                   | $93.40 \pm 1.29$                   | $97.86 \pm 0.35$                   | <b><math>99.04 \pm 0.18</math></b> | $99.33 \pm 0.22$                   |
| MER                 | $81.47 \pm 1.56$                   | $88.35 \pm 0.41$                   | $94.57 \pm 0.18$                   | $98.05 \pm 0.25$                   | $98.43 \pm 0.11$                   | $99.27 \pm 0.09$                   |
| GEM                 | $80.11 \pm 1.54$                   | $85.99 \pm 1.35$                   | $95.11 \pm 0.87$                   | $97.78 \pm 0.25$                   | $98.71 \pm 0.20$                   | $99.44 \pm 0.12$                   |
| A-GEM               | $45.72 \pm 4.26$                   | $46.66 \pm 5.85$                   | $54.24 \pm 6.49$                   | $98.61 \pm 0.24$                   | $98.93 \pm 0.21$                   | $98.93 \pm 0.20$                   |
| iCaRL               | $70.51 \pm 0.53$                   | $70.10 \pm 1.08$                   | $70.60 \pm 1.03$                   | $98.28 \pm 0.09$                   | $98.32 \pm 0.07$                   | $98.32 \pm 0.11$                   |
| FDR                 | $79.43 \pm 3.26$                   | $85.87 \pm 4.04$                   | $87.47 \pm 3.15$                   | $97.66 \pm 0.18$                   | $97.54 \pm 1.90$                   | $97.79 \pm 1.33$                   |
| GSS                 | $38.90 \pm 2.49$                   | $49.76 \pm 4.73$                   | $89.39 \pm 0.75$                   | $95.02 \pm 1.85$                   | $97.71 \pm 0.53$                   | $98.33 \pm 0.17$                   |
| HAL                 | $84.70 \pm 0.87$                   | $87.21 \pm 0.49$                   | $89.52 \pm 0.96$                   | $97.96 \pm 0.21$                   | $98.03 \pm 0.22$                   | $98.35 \pm 0.17$                   |
| <b>DER (ours)</b>   | $84.55 \pm 1.64$                   | $90.54 \pm 1.18$                   | $94.90 \pm 0.57$                   | <b><math>98.80 \pm 0.15</math></b> | $98.84 \pm 0.13$                   | $99.29 \pm 0.11$                   |
| <b>DER++ (ours)</b> | <b><math>85.61 \pm 1.40</math></b> | <b><math>91.00 \pm 1.49</math></b> | <b><math>95.30 \pm 1.20</math></b> | $98.76 \pm 0.28$                   | $98.94 \pm 0.27$                   | <b><math>99.47 \pm 0.07</math></b> |

Table 4: Results for the Sequential-MNIST dataset.

### F.2 Additional Comparisons with Experience Replay

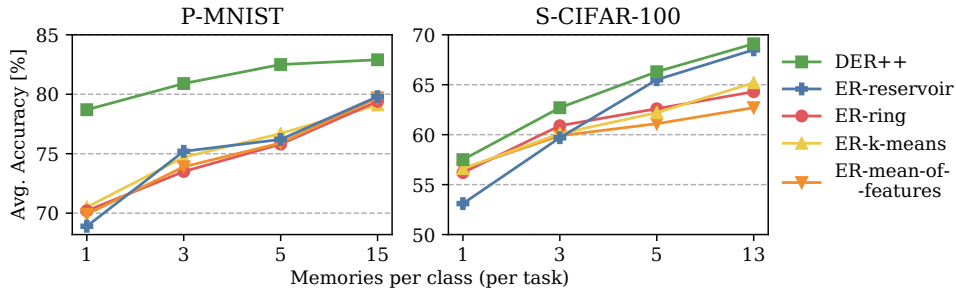

Figure 4: A comparison between our proposal (DER++) and the variants of Experience Replay presented in [5].

In the main paper we already draw a thorough comparison with Experience Replay (ER), showing that DER and DER++ often result in better performance and more remarkable capabilities. It is worth

noting that the ER we compared with was equipped with the *reservoir* strategy; therefore, it would be interesting to see whether the same experimental conclusions also hold for other variants of naive replay (e.g. ER with ring-buffer). For this reason, Fig. 4 provides further analysis in the setting of [5], which investigates what happens when varying the number of samples that are retained for later replay. Interestingly, while *reservoir* weakens ER when very few past memories are available, it does not bring DER++ to the same flaw. In the low-memory regime, indeed, the probability of leaving a class out from the buffer increases: while ER would not have any chance to retain the knowledge underlying these “ghost” classes, we conjecture that DER++ could recover this information from the non-argmax outputs of the past predicted distribution.

### F.3 Single-Epoch Setting

|                       | Buffer | ER    | FDR   | DER++        | JOINT | JOINT  |
|-----------------------|--------|-------|-------|--------------|-------|--------|
| #epochs               |        | 1     | 1     | 1            | 1     | 50/100 |
| Seq.<br>CIFAR-10      | 200    | 37.64 | 21.22 | <b>41.93</b> | 56.74 | 92.20  |
|                       | 500    | 45.22 | 21.06 | <b>48.04</b> |       |        |
|                       | 5120   | 50.28 | 20.57 | <b>53.31</b> |       |        |
| Seq.<br>Tiny ImageNet | 200    | 5.98  | 4.87  | <b>6.35</b>  | 19.37 | 59.99  |
|                       | 500    | 8.39  | 4.76  | <b>8.65</b>  |       |        |
|                       | 5120   | 16.04 | 4.96  | <b>16.41</b> |       |        |

Table 5: Single-epoch evaluation setting (Class-IL).

Several Continual Learning works present experiments even on fairly complex datasets (e.g.: CIFAR-10, CIFAR-100, Mini ImageNet) in which the model is only trained for one epoch for each task [1, 3, 4, 7]. As showing the model each example only once could be deemed closer to real-world CL scenarios, this is a very compelling setting and somewhat close in spirit to the reasons why we focus on General Continual Learning.

However, we see that committing to just one epoch (hence, few gradient steps) makes it difficult to disentangle the effects of catastrophic forgetting (the focus of our work) from those of underfitting. This is especially relevant when dealing with complex datasets and deserves further investigation: for this reason, we conduct a single-epoch experiment on Seq. CIFAR-10 and Seq. Tiny ImageNet. We include in Tab. 5 the performance of different rehearsal methods; additionally, we report the results of joint training when limiting the number of epochs to one and, *vice versa*, when such limitation is removed (see last two columns). While the multi-epoch joint training learns to classify with a satisfactory accuracy, the single-epoch counterpart (which is the upper bound to all other methods in this experiment) yields a much lower accuracy and underfits dramatically. In light of this, it is hard to evaluate the merits of other CL methods, whose evaluation is severely undermined by this confounding factor. Although DER++ proves reliable even in this difficult setting, we feel that future CL works should strive for realism by designing experimental settings which are fully in line with the guidelines of GCL [6] rather than adopting the single-epoch protocol.

### F.4 Forward and Backward Transfer

In this section, we present additional results for the experiments presented in Sec. 4.2 and F.1, reporting *Forward Transfer* (FWT), *Backward Transfer* (BWT) [7] and *Forgetting* (FRG) [2]. The first one assesses whether a model is capable of improving on unseen tasks w.r.t. random guessing, whereas the second and third ones measure the performance degradation in subsequent tasks. Despite their popularity in recent CL works [2, 3, 6, 7], we did not report them in the main paper because we believe that the average accuracy represents an already exhaustive measure of CL performance.

FWT is computed as the difference between the accuracy just before starting training on a given task and the one of the random-initialized network; it is averaged across all tasks. While one can argue that learning to classify unseen classes is desirable, the meaning of such a measure is highly dependent on the setting. Indeed, Class-IL and Task-IL show distinct classes in distinct tasks, which makes transfer impossible. On the contrary, FWT can be relevant for Domain-IL scenarios, provided

that the input transformation is not disruptive (as it is the case with Permuted-MNIST). In conclusion, as CL settings sooner or later show all classes to the network, we are primarily interested in the accuracy at the end of the training, not the one before seeing any example.

FRG and BWT compute the difference between the current accuracy and its best value for each task. It is worth noting that any method that restrains the learning of the current task could exhibit high backward transfer but low final accuracy. This is as easy as increasing the weight of the regularization term: this way, the past knowledge is well-preserved but the current task is not learned properly. Moreover, BWT makes the assumption that the highest value of the accuracy on a task is the one yielded at the end of it. This is not always true, as rehearsal-based methods can exploit the memory buffer in a subsequent task, even enhancing their performance on a previous one if they start from low accuracy.

| FORWARD TRANSFER |                     |                                  |                                 |                                  |                                 |                                 |                                  |
|------------------|---------------------|----------------------------------|---------------------------------|----------------------------------|---------------------------------|---------------------------------|----------------------------------|
| Buffer           | Method              | S-MNIST                          |                                 | S-CIFAR-10                       |                                 | P-MNIST                         | R-MNIST                          |
|                  |                     | Class-IL                         | Task-IL                         | Class-IL                         | Task-IL                         | Domain-IL                       | Domain-IL                        |
| -                | SGD                 | -11.06 $\pm$ 2.90                | 2.33 $\pm$ 4.71                 | -9.09 $\pm$ 0.11                 | -1.46 $\pm$ 1.17                | 0.32 $\pm$ 0.85                 | 48.94 $\pm$ 0.10                 |
|                  | oEWC                | -7.44 $\pm$ 4.18                 | -0.13 $\pm$ 8.12                | -12.51 $\pm$ 0.02                | -4.09 $\pm$ 7.97                | 0.69 $\pm$ 0.97                 | 52.45 $\pm$ 8.75                 |
|                  | SI                  | -9.50 $\pm$ 5.27                 | -1.34 $\pm$ 5.42                | -12.64 $\pm$ 0.20                | -2.33 $\pm$ 2.29                | <b>0.71<math>\pm</math>1.89</b> | <b>53.09<math>\pm</math>0.73</b> |
|                  | LwF                 | -12.39 $\pm$ 4.06                | 1.30 $\pm$ 5.40                 | -10.63 $\pm$ 5.12                | <b>0.73<math>\pm</math>4.36</b> | -                               | -                                |
|                  | PNN                 | -                                | N/A                             | -                                | N/A                             | -                               | -                                |
| 200              | ER                  | -12.12 $\pm$ 2.21                | -0.86 $\pm$ 3.24                | -11.02 $\pm$ 2.77                | 2.10 $\pm$ 1.27                 | 1.37 $\pm$ 0.48                 | 66.79 $\pm$ 0.05                 |
|                  | MER                 | -11.03 $\pm$ 3.40                | -2.18 $\pm$ 3.51                | -                                | -                               | -                               | -                                |
|                  | GEM                 | -10.26 $\pm$ 3.08                | -0.16 $\pm$ 5.89                | -7.50 $\pm$ 7.05                 | 0.13 $\pm$ 3.54                 | 0.42 $\pm$ 0.35                 | 54.06 $\pm$ 4.35                 |
|                  | A-GEM               | -10.04 $\pm$ 3.11                | 2.39 $\pm$ 6.96                 | -11.37 $\pm$ 0.08                | -0.34 $\pm$ 0.13                | 0.83 $\pm$ 0.57                 | 54.84 $\pm$ 10.45                |
|                  | iCaRL               | N/A                              | N/A                             | N/A                              | N/A                             | -                               | -                                |
|                  | FDR                 | -12.06 $\pm$ 2.22                | -0.81 $\pm$ 3.89                | -12.75 $\pm$ 0.30                | -2.42 $\pm$ 0.86                | -1.24 $\pm$ 0.06                | 60.71 $\pm$ 8.17                 |
|                  | GSS                 | -11.31 $\pm$ 2.58                | 2.99 $\pm$ 6.61                 | -7.08 $\pm$ 10.01                | <b>6.17<math>\pm</math>2.06</b> | 0.04 $\pm$ 0.85                 | 57.28 $\pm$ 4.47                 |
|                  | HAL                 | -11.15 $\pm$ 3.56                | -0.20 $\pm$ 3.99                | -11.94 $\pm$ 0.80                | -0.02 $\pm$ 0.10                | <b>1.72<math>\pm</math>0.08</b> | 59.95 $\pm$ 3.71                 |
|                  | <b>DER (ours)</b>   | -10.16 $\pm$ 3.78                | <b>3.23<math>\pm</math>5.24</b> | -11.89 $\pm$ 0.88                | 0.27 $\pm$ 7.12                 | 1.23 $\pm$ 0.26                 | 64.69 $\pm$ 2.02                 |
|                  | <b>DER++ (ours)</b> | -12.42 $\pm$ 1.84                | -2.33 $\pm$ 5.69                | <b>-4.88<math>\pm</math>6.90</b> | 2.68 $\pm$ 0.11                 | 0.91 $\pm$ 0.45                 | <b>67.21<math>\pm</math>2.13</b> |
|                  | ER                  | -10.42 $\pm$ 3.42                | 1.02 $\pm$ 5.55                 | -8.42 $\pm$ 4.83                 | -3.12 $\pm$ 4.02                | 0.56 $\pm$ 2.52                 | 65.52 $\pm$ 1.56                 |
| 500              | MER                 | -10.59 $\pm$ 3.83                | 0.89 $\pm$ 5.03                 | -                                | -                               | -                               | -                                |
|                  | GEM                 | -10.59 $\pm$ 3.26                | 0.11 $\pm$ 5.66                 | -12.53 $\pm$ 0.65                | 1.36 $\pm$ 3.05                 | 0.17 $\pm$ 0.59                 | 54.19 $\pm$ 2.37                 |
|                  | A-GEM               | -9.74 $\pm$ 3.60                 | 1.10 $\pm$ 7.30                 | -6.38 $\pm$ 8.64                 | <b>6.36<math>\pm</math>3.88</b> | 0.03 $\pm$ 1.20                 | 52.50 $\pm$ 0.51                 |
|                  | iCaRL               | N/A                              | N/A                             | N/A                              | N/A                             | -                               | -                                |
|                  | FDR                 | -9.27 $\pm$ 2.80                 | 4.73 $\pm$ 5.08                 | <b>-6.23<math>\pm</math>8.79</b> | 3.71 $\pm$ 2.70                 | -0.32 $\pm$ 0.43                | 65.97 $\pm$ 1.02                 |
|                  | GSS                 | -10.16 $\pm$ 3.48                | 0.17 $\pm$ 5.32                 | -7.84 $\pm$ 4.43                 | 2.11 $\pm$ 3.31                 | <b>0.89<math>\pm</math>0.94</b> | 58.19 $\pm$ 4.42                 |
|                  | HAL                 | -9.02 $\pm$ 5.06                 | 0.79 $\pm$ 7.26                 | -7.15 $\pm$ 7.57                 | 3.06 $\pm$ 1.03                 | 1.33 $\pm$ 0.23                 | 64.21 $\pm$ 3.16                 |
|                  | <b>DER (ours)</b>   | <b>-7.96<math>\pm</math>2.57</b> | <b>1.17<math>\pm</math>6.37</b> | -13.26 $\pm$ 1.08                | -4.52 $\pm$ 2.39                | 0.21 $\pm$ 1.21                 | <b>72.45<math>\pm</math>0.14</b> |
|                  | <b>DER++ (ours)</b> | -10.90 $\pm$ 4.88                | -2.92 $\pm$ 5.32                | -6.29 $\pm$ 8.89                 | -0.31 $\pm$ 1.86                | -0.35 $\pm$ 0.01                | 67.05 $\pm$ 0.11                 |
|                  | ER                  | -10.97 $\pm$ 3.70                | 0.17 $\pm$ 3.46                 | -8.45 $\pm$ 10.75                | -1.05 $\pm$ 5.87                | <b>1.46<math>\pm</math>1.15</b> | <b>73.03<math>\pm</math>1.59</b> |
|                  | MER                 | -10.50 $\pm$ 3.35                | -0.33 $\pm$ 5.81                | -                                | -                               | -                               | -                                |
| 5120             | GEM                 | -9.51 $\pm$ 3.83                 | -0.28 $\pm$ 9.16                | -9.18 $\pm$ 4.27                 | -1.24 $\pm$ 0.83                | 1.03 $\pm$ 0.89                 | 62.06 $\pm$ 3.01                 |
|                  | A-GEM               | -11.31 $\pm$ 3.44                | <b>1.14<math>\pm</math>7.08</b> | -8.01 $\pm$ 6.31                 | -3.94 $\pm$ 0.82                | 0.43 $\pm$ 0.39                 | 51.05 $\pm$ 1.34                 |
|                  | iCaRL               | N/A                              | N/A                             | N/A                              | N/A                             | -                               | -                                |
|                  | FDR                 | <b>-9.25<math>\pm</math>4.65</b> | -1.30 $\pm$ 5.90                | -7.69 $\pm$ 5.95                 | -0.52 $\pm$ 0.54                | -0.13 $\pm$ 0.54                | 72.54 $\pm$ 0.35                 |
|                  | GSS                 | -10.89 $\pm$ 3.52                | -2.19 $\pm$ 6.64                | -9.88 $\pm$ 2.21                 | -0.13 $\pm$ 5.24                | 0.34 $\pm$ 1.49                 | 63.39 $\pm$ 4.55                 |
|                  | HAL                 | -10.06 $\pm$ 4.46                | 0.16 $\pm$ 7.43                 | -10.34 $\pm$ 3.22                | 0.32 $\pm$ 1.09                 | 0.52 $\pm$ 0.47                 | 66.00 $\pm$ 0.09                 |
|                  | <b>DER (ours)</b>   | -11.59 $\pm$ 4.34                | -2.42 $\pm$ 5.22                | <b>-5.98<math>\pm</math>8.44</b> | 2.37 $\pm$ 3.98                 | 0.32 $\pm$ 0.18                 | 71.12 $\pm$ 0.53                 |
|                  | <b>DER++ (ours)</b> | -10.71 $\pm$ 2.95                | 0.20 $\pm$ 9.44                 | -11.23 $\pm$ 2.67                | <b>4.56<math>\pm</math>0.02</b> | 0.06 $\pm$ 0.22                 | 72.11 $\pm$ 1.81                 |

Table 6: Forward Transfer results for the Experiments of Sec. 4.2 and F.1.

| BACKWARD TRANSFER |              |                    |                  |                   |                   |                   |                   |
|-------------------|--------------|--------------------|------------------|-------------------|-------------------|-------------------|-------------------|
| Buffer            | Method       | S-MNIST            |                  | S-CIFAR-10        |                   | P-MNIST           | R-MNIST           |
|                   |              | Class-IL           | Task-IL          | Class-IL          | Task-IL           | Domain-IL         | Domain-IL         |
| -                 | SGD          | -99.10 $\pm$ 0.55  | -4.98 $\pm$ 2.58 | -96.39 $\pm$ 0.12 | -46.24 $\pm$ 2.12 | -57.65 $\pm$ 4.32 | -20.34 $\pm$ 2.50 |
| -                 | oEWC         | -97.79 $\pm$ 1.24  | -0.38 $\pm$ 0.19 | -91.64 $\pm$ 3.07 | -29.13 $\pm$ 4.11 | -36.69 $\pm$ 2.34 | -24.59 $\pm$ 5.37 |
|                   | SI           | -98.89 $\pm$ 0.86  | -3.46 $\pm$ 1.69 | -95.78 $\pm$ 0.64 | -38.76 $\pm$ 0.89 | -27.91 $\pm$ 0.31 | -22.91 $\pm$ 0.26 |
|                   | LwF          | -99.30 $\pm$ 0.11  | -6.21 $\pm$ 3.67 | -96.69 $\pm$ 0.25 | -32.56 $\pm$ 0.56 | -                 | -                 |
|                   | PNN          | -                  | 0.00 $\pm$ 0.00  | -                 | 0.00 $\pm$ 0.00   | -                 | -                 |
| 200               | ER           | -21.36 $\pm$ 2.46  | -0.82 $\pm$ 0.41 | -61.24 $\pm$ 2.62 | -7.08 $\pm$ 0.64  | -22.54 $\pm$ 0.95 | -8.24 $\pm$ 1.56  |
|                   | MER          | -20.38 $\pm$ 1.97  | -0.81 $\pm$ 0.20 | -                 | -                 | -                 | -                 |
|                   | GEM          | -22.32 $\pm$ 2.04  | -1.14 $\pm$ 0.48 | -82.61 $\pm$ 1.60 | -9.27 $\pm$ 2.07  | -29.38 $\pm$ 2.56 | -11.51 $\pm$ 4.75 |
|                   | A-GEM        | -66.15 $\pm$ 6.84  | -0.06 $\pm$ 2.95 | -95.73 $\pm$ 0.20 | -16.39 $\pm$ 0.86 | -31.69 $\pm$ 3.92 | -19.32 $\pm$ 1.17 |
|                   | iCaRL        | -11.73 $\pm$ 0.73  | -0.23 $\pm$ 0.06 | -28.72 $\pm$ 0.49 | -1.01 $\pm$ 4.15  | -                 | -                 |
|                   | FDR          | -21.15 $\pm$ 4.18  | -0.50 $\pm$ 0.19 | -86.40 $\pm$ 2.67 | -7.36 $\pm$ 0.03  | -20.62 $\pm$ 0.65 | -13.31 $\pm$ 2.60 |
|                   | GSS          | -74.10 $\pm$ 3.03  | -4.29 $\pm$ 2.31 | -75.25 $\pm$ 4.07 | -8.56 $\pm$ 1.78  | -47.85 $\pm$ 1.82 | -20.19 $\pm$ 6.45 |
|                   | HAL          | -14.54 $\pm$ 1.49  | -0.48 $\pm$ 0.20 | -69.11 $\pm$ 4.21 | -11.91 $\pm$ 0.52 | -15.24 $\pm$ 1.33 | -11.71 $\pm$ 0.26 |
|                   | DER (ours)   | -17.66 $\pm$ 2.10  | -0.56 $\pm$ 0.18 | -40.76 $\pm$ 0.42 | -6.21 $\pm$ 0.71  | -13.79 $\pm$ 0.80 | -5.99 $\pm$ 0.46  |
|                   | DER++ (ours) | -16.27 $\pm$ 1.73  | -0.55 $\pm$ 0.37 | -32.59 $\pm$ 2.32 | -5.16 $\pm$ 0.21  | -11.47 $\pm$ 0.33 | -5.27 $\pm$ 0.26  |
| 500               | ER           | -15.97 $\pm$ 2.46  | -0.36 $\pm$ 0.20 | -45.35 $\pm$ 0.07 | -3.54 $\pm$ 0.35  | -14.90 $\pm$ 0.39 | -7.52 $\pm$ 1.44  |
|                   | MER          | -11.52 $\pm$ 0.56  | -0.44 $\pm$ 0.17 | -                 | -                 | -                 | -                 |
|                   | GEM          | -15.47 $\pm$ 2.03  | -0.27 $\pm$ 0.98 | -74.31 $\pm$ 4.62 | -9.12 $\pm$ 0.21  | -18.76 $\pm$ 0.91 | -7.19 $\pm$ 1.40  |
|                   | A-GEM        | -65.84 $\pm$ 7.24  | -0.54 $\pm$ 0.20 | -94.01 $\pm$ 1.16 | -14.26 $\pm$ 4.18 | -28.53 $\pm$ 2.01 | -19.36 $\pm$ 3.18 |
|                   | iCaRL        | -11.84 $\pm$ 0.73  | -0.25 $\pm$ 0.09 | -25.71 $\pm$ 1.10 | -1.06 $\pm$ 4.21  | -                 | -                 |
|                   | FDR          | -13.90 $\pm$ 5.19  | -1.27 $\pm$ 2.43 | -85.62 $\pm$ 0.36 | -4.80 $\pm$ 0.30  | -12.80 $\pm$ 1.28 | -6.70 $\pm$ 1.93  |
|                   | GSS          | -60.35 $\pm$ 6.03  | -0.77 $\pm$ 0.62 | -62.88 $\pm$ 2.67 | -7.73 $\pm$ 3.99  | -23.68 $\pm$ 1.35 | -17.45 $\pm$ 9.92 |
|                   | HAL          | -9.97 $\pm$ 1.62   | -0.30 $\pm$ 0.26 | -62.21 $\pm$ 4.34 | -5.41 $\pm$ 1.10  | -11.58 $\pm$ 0.49 | -6.78 $\pm$ 0.87  |
|                   | DER (ours)   | -9.58 $\pm$ 1.52   | -0.39 $\pm$ 0.18 | -26.74 $\pm$ 0.15 | -4.56 $\pm$ 0.45  | -8.04 $\pm$ 0.42  | -3.41 $\pm$ 2.18  |
|                   | DER++ (ours) | -8.85 $\pm$ 1.86   | -0.34 $\pm$ 0.16 | -22.38 $\pm$ 4.41 | -4.66 $\pm$ 1.15  | -7.62 $\pm$ 1.02  | -3.18 $\pm$ 0.14  |
| 5120              | ER           | -6.07 $\pm$ 1.84   | 0.03 $\pm$ 0.36  | -13.99 $\pm$ 1.12 | 0.08 $\pm$ 0.06   | -5.24 $\pm$ 0.13  | -2.55 $\pm$ 0.53  |
|                   | MER          | -3.22 $\pm$ 0.33   | 0.05 $\pm$ 0.11  | -                 | -                 | -                 | -                 |
|                   | GEM          | -4.14 $\pm$ 1.43   | 0.16 $\pm$ 0.85  | -75.27 $\pm$ 4.41 | -6.91 $\pm$ 2.33  | -6.74 $\pm$ 0.49  | -0.06 $\pm$ 0.29  |
|                   | A-GEM        | -55.04 $\pm$ 10.93 | 0.78 $\pm$ 4.16  | -84.49 $\pm$ 3.08 | -9.89 $\pm$ 0.40  | -23.73 $\pm$ 2.22 | -17.70 $\pm$ 1.28 |
|                   | iCaRL        | -11.64 $\pm$ 0.72  | -0.22 $\pm$ 0.08 | -24.94 $\pm$ 0.14 | -0.99 $\pm$ 1.41  | -                 | -                 |
|                   | FDR          | -11.58 $\pm$ 3.97  | -0.87 $\pm$ 1.66 | -96.64 $\pm$ 0.19 | -1.89 $\pm$ 0.51  | -3.81 $\pm$ 0.13  | -2.81 $\pm$ 0.47  |
|                   | GSS          | -7.90 $\pm$ 1.21   | -0.09 $\pm$ 0.15 | -58.11 $\pm$ 9.12 | -6.38 $\pm$ 1.71  | -19.82 $\pm$ 1.31 | -17.05 $\pm$ 2.31 |
|                   | HAL          | -6.55 $\pm$ 1.63   | 0.02 $\pm$ 0.20  | -27.19 $\pm$ 7.53 | -4.51 $\pm$ 0.54  | -4.27 $\pm$ 0.22  | -2.25 $\pm$ 0.01  |
|                   | DER (ours)   | -4.53 $\pm$ 0.83   | -0.31 $\pm$ 0.08 | -10.12 $\pm$ 0.80 | -2.59 $\pm$ 0.08  | -3.49 $\pm$ 0.02  | -1.73 $\pm$ 0.10  |
|                   | DER++ (ours) | -4.19 $\pm$ 1.63   | -0.13 $\pm$ 0.09 | -6.89 $\pm$ 0.50  | -1.16 $\pm$ 0.22  | -2.93 $\pm$ 0.15  | -1.18 $\pm$ 0.53  |

Table 7: Backward Transfer results for the Experiments of Sec. 4.2 and F.1.



| FORGETTING |                     |                                  |                                 |                                  |                                 |                                  |                                  |
|------------|---------------------|----------------------------------|---------------------------------|----------------------------------|---------------------------------|----------------------------------|----------------------------------|
| Buffer     | Method              | S-MNIST                          |                                 | S-CIFAR-10                       |                                 | P-MNIST                          | R-MNIST                          |
|            |                     | Class-IL                         | Task-IL                         | Class-IL                         | Task-IL                         | Domain-IL                        | Domain-IL                        |
| -          | SGD                 | 99.10 $\pm$ 0.55                 | 5.15 $\pm$ 2.74                 | 96.39 $\pm$ 0.12                 | 46.24 $\pm$ 2.12                | 57.65 $\pm$ 4.32                 | 20.82 $\pm$ 2.47                 |
| -          | oEWC                | <b>97.79<math>\pm</math>1.24</b> | 0.44 $\pm$ 0.16                 | <b>91.64<math>\pm</math>3.07</b> | 29.33 $\pm$ 3.84                | 36.69 $\pm$ 2.34                 | 36.44 $\pm$ 1.44                 |
|            | SI                  | 98.89 $\pm$ 0.86                 | 5.15 $\pm$ 2.74                 | 95.78 $\pm$ 0.64                 | 38.76 $\pm$ 0.89                | <b>27.91<math>\pm</math>0.31</b> | <b>23.41<math>\pm</math>0.49</b> |
|            | LwF                 | 99.30 $\pm$ 0.11                 | 5.15 $\pm$ 2.74                 | 96.69 $\pm$ 0.25                 | 32.56 $\pm$ 0.56                | -                                | -                                |
|            | PNN                 | -                                | <b>0.00<math>\pm</math>0.00</b> | -                                | <b>0.00<math>\pm</math>0.00</b> | -                                | -                                |
| 200        | ER                  | 21.36 $\pm$ 2.46                 | 0.84 $\pm$ 0.41                 | 61.24 $\pm$ 2.62                 | 7.08 $\pm$ 0.64                 | 22.54 $\pm$ 0.95                 | 8.87 $\pm$ 1.44                  |
|            | MER                 | 20.38 $\pm$ 1.97                 | 0.82 $\pm$ 0.21                 | -                                | -                               | -                                | -                                |
|            | GEM                 | 22.32 $\pm$ 2.04                 | 1.19 $\pm$ 0.38                 | 82.61 $\pm$ 1.60                 | 9.27 $\pm$ 2.07                 | 29.38 $\pm$ 2.56                 | 12.97 $\pm$ 4.82                 |
|            | A-GEM               | 66.15 $\pm$ 6.84                 | 0.96 $\pm$ 0.28                 | 95.73 $\pm$ 0.20                 | 16.39 $\pm$ 0.86                | 31.69 $\pm$ 3.92                 | 20.05 $\pm$ 1.12                 |
|            | iCaRL               | <b>11.73<math>\pm</math>0.73</b> | <b>0.28<math>\pm</math>0.08</b> | <b>28.72<math>\pm</math>0.49</b> | <b>2.63<math>\pm</math>3.48</b> | -                                | -                                |
|            | FDR                 | 21.15 $\pm$ 4.18                 | 0.52 $\pm$ 0.18                 | 86.40 $\pm$ 2.67                 | 7.36 $\pm$ 0.03                 | 20.62 $\pm$ 0.65                 | 13.66 $\pm$ 2.52                 |
|            | GSS                 | 74.10 $\pm$ 3.03                 | 4.30 $\pm$ 2.31                 | 75.25 $\pm$ 4.07                 | 8.56 $\pm$ 1.78                 | 47.85 $\pm$ 1.82                 | 20.71 $\pm$ 6.50                 |
|            | HAL                 | 14.54 $\pm$ 1.49                 | 0.53 $\pm$ 0.19                 | 69.11 $\pm$ 4.21                 | 12.26 $\pm$ 0.02                | 79.00 $\pm$ 1.17                 | 83.59 $\pm$ 0.04                 |
|            | <b>DER (ours)</b>   | 17.66 $\pm$ 2.10                 | 0.57 $\pm$ 0.18                 | 40.76 $\pm$ 0.42                 | 6.57 $\pm$ 0.20                 | 14.00 $\pm$ 0.73                 | 6.53 $\pm$ 0.32                  |
|            | <b>DER++ (ours)</b> | 16.27 $\pm$ 1.73                 | 0.66 $\pm$ 0.28                 | 32.59 $\pm$ 2.32                 | 5.16 $\pm$ 0.21                 | <b>11.49<math>\pm</math>0.31</b> | <b>6.08<math>\pm</math>0.43</b>  |
| 500        | ER                  | 15.97 $\pm$ 2.46                 | 0.39 $\pm$ 0.20                 | 45.35 $\pm$ 0.07                 | 3.54 $\pm$ 0.35                 | 14.90 $\pm$ 0.39                 | 8.02 $\pm$ 1.56                  |
|            | MER                 | 11.52 $\pm$ 0.56                 | 0.45 $\pm$ 0.17                 | -                                | -                               | -                                | -                                |
|            | GEM                 | 15.57 $\pm$ 1.77                 | 0.54 $\pm$ 0.15                 | 74.31 $\pm$ 4.62                 | 9.12 $\pm$ 0.21                 | 18.76 $\pm$ 0.91                 | 8.79 $\pm$ 1.44                  |
|            | A-GEM               | 65.84 $\pm$ 7.24                 | 0.64 $\pm$ 0.20                 | 94.01 $\pm$ 1.16                 | 14.26 $\pm$ 4.18                | 28.53 $\pm$ 2.01                 | 19.70 $\pm$ 3.14                 |
|            | iCaRL               | 11.84 $\pm$ 0.73                 | <b>0.30<math>\pm</math>0.09</b> | 25.71 $\pm$ 1.10                 | <b>2.66<math>\pm</math>2.47</b> | -                                | -                                |
|            | FDR                 | 13.90 $\pm$ 5.19                 | 1.35 $\pm$ 2.40                 | 85.62 $\pm$ 0.36                 | 4.80 $\pm$ 0.00                 | 12.80 $\pm$ 1.28                 | 7.21 $\pm$ 1.89                  |
|            | GSS                 | 60.35 $\pm$ 6.03                 | 0.89 $\pm$ 0.40                 | 62.88 $\pm$ 2.67                 | 7.73 $\pm$ 3.99                 | 23.68 $\pm$ 1.35                 | 18.05 $\pm$ 9.89                 |
|            | HAL                 | 9.97 $\pm$ 1.62                  | 0.35 $\pm$ 0.21                 | 62.21 $\pm$ 4.34                 | 5.41 $\pm$ 1.10                 | 82.53 $\pm$ 0.36                 | 88.53 $\pm$ 0.77                 |
|            | <b>DER (ours)</b>   | 9.58 $\pm$ 1.52                  | 0.45 $\pm$ 0.13                 | 26.74 $\pm$ 0.15                 | 4.56 $\pm$ 0.45                 | 8.07 $\pm$ 0.43                  | 3.96 $\pm$ 2.08                  |
|            | <b>DER++ (ours)</b> | <b>8.85<math>\pm</math>1.86</b>  | 0.35 $\pm$ 0.15                 | <b>22.38<math>\pm</math>4.41</b> | 4.66 $\pm$ 1.15                 | <b>7.67<math>\pm</math>1.05</b>  | <b>3.57<math>\pm</math>0.09</b>  |
| 5120       | ER                  | 6.08 $\pm$ 1.84                  | 0.25 $\pm$ 0.23                 | 13.99 $\pm$ 1.12                 | 0.27 $\pm$ 0.06                 | 5.24 $\pm$ 0.13                  | 3.10 $\pm$ 0.42                  |
|            | MER                 | <b>3.22<math>\pm</math>0.33</b>  | <b>0.07<math>\pm</math>0.06</b> | -                                | -                               | -                                | -                                |
|            | GEM                 | 4.30 $\pm$ 1.16                  | 0.16 $\pm$ 0.09                 | 75.27 $\pm$ 4.41                 | 6.91 $\pm$ 2.33                 | 6.74 $\pm$ 0.49                  | 2.49 $\pm$ 0.17                  |
|            | A-GEM               | 55.10 $\pm$ 10.79                | 0.63 $\pm$ 0.21                 | 84.49 $\pm$ 3.08                 | 11.36 $\pm$ 1.68                | 23.74 $\pm$ 2.23                 | 18.10 $\pm$ 1.44                 |
|            | iCaRL               | 11.64 $\pm$ 0.72                 | 0.26 $\pm$ 0.06                 | 24.94 $\pm$ 0.14                 | 1.59 $\pm$ 0.57                 | -                                | -                                |
|            | FDR                 | 11.58 $\pm$ 3.97                 | 0.95 $\pm$ 1.61                 | 96.64 $\pm$ 0.19                 | 1.93 $\pm$ 0.48                 | 3.82 $\pm$ 0.12                  | 3.31 $\pm$ 0.56                  |
|            | GSS                 | 7.90 $\pm$ 1.21                  | 0.18 $\pm$ 0.11                 | 58.11 $\pm$ 9.12                 | 7.71 $\pm$ 2.31                 | 89.76 $\pm$ 0.39                 | 92.66 $\pm$ 0.02                 |
|            | HAL                 | 6.55 $\pm$ 1.63                  | 0.13 $\pm$ 0.07                 | 27.19 $\pm$ 7.53                 | 5.21 $\pm$ 0.50                 | 19.97 $\pm$ 1.33                 | 17.62 $\pm$ 2.33                 |
|            | <b>DER (ours)</b>   | 4.53 $\pm$ 0.83                  | 0.32 $\pm$ 0.08                 | 10.12 $\pm$ 0.80                 | 2.59 $\pm$ 0.08                 | 3.51 $\pm$ 0.03                  | 2.17 $\pm$ 0.11                  |
|            | <b>DER++ (ours)</b> | 4.19 $\pm$ 1.63                  | 0.23 $\pm$ 0.06                 | <b>7.27<math>\pm</math>0.84</b>  | <b>1.18<math>\pm</math>0.19</b> | <b>2.96<math>\pm</math>0.14</b>  | <b>1.62<math>\pm</math>0.50</b>  |

Table 8: Forgetting results for the Experiments of Sec. 4.2 and F.1.

## G Hyperparameter Search

### G.1 Best values

In Table 9, we show the best hyperparameter combination that we chose for each method for the experiments in the main paper, according to the criteria outlined in Section 4.1. We denote the learning rate with  $lr$ , the batch size with  $bs$  and the minibatch size (i.e. the size of the batches drawn from the buffer in rehearsal-based methods) with  $mbs$ , while other symbols refer to the respective methods. We hold *batch size* and *minibatch size* out of the hyperparameter search space for all Continual Learning benchmarks. Their values are fixed as follows: Sequential MNIST: 10; Sequential CIFAR-10, Sequential Tiny ImageNet: 32; Permuted MNIST, Rotated MNIST: 128.

Conversely, *batch size* and *minibatch size* belong to the hyperparameter search space for experiments on the novel MNIST-360 dataset. It must be noted that MER does not depend on *batch size*, as it internally always adopts a single-example forward pass.

| <i>Method</i> | <i>Buffer</i> | <b>Permuted MNIST</b>                                             | <i>Buffer</i> | <b>Rotated MNIST</b>                                            |
|---------------|---------------|-------------------------------------------------------------------|---------------|-----------------------------------------------------------------|
| SGD           | –             | $lr: 0.2$                                                         | –             | $lr: 0.2$                                                       |
| oEWC          | –             | $lr: 0.1 \quad \lambda: 0.7 \quad \gamma: 1.0$                    | –             | $lr: 0.1 \quad \lambda: 0.7 \quad \gamma: 1.0$                  |
| SI            | –             | $lr: 0.1 \quad c: 0.5 \quad \xi: 1.0$                             | –             | $lr: 0.1 \quad c: 1.0 \quad \xi: 1.0$                           |
| ER            | 200           | $lr: 0.2$                                                         | 200           | $lr: 0.2$                                                       |
|               | 500           | $lr: 0.2$                                                         | 500           | $lr: 0.2$                                                       |
|               | 5120          | $lr: 0.2$                                                         | 5120          | $lr: 0.2$                                                       |
| GEM           | 200           | $lr: 0.1 \quad \gamma: 0.5$                                       | 200           | $lr: 0.01 \quad \gamma: 0.5$                                    |
|               | 500           | $lr: 0.1 \quad \gamma: 0.5$                                       | 500           | $lr: 0.01 \quad \gamma: 0.5$                                    |
|               | 5120          | $lr: 0.1 \quad \gamma: 0.5$                                       | 5120          | $lr: 0.01 \quad \gamma: 0.5$                                    |
| A-GEM         | 200           | $lr: 0.1$                                                         | 200           | $lr: 0.1$                                                       |
|               | 500           | $lr: 0.1$                                                         | 500           | $lr: 0.3$                                                       |
|               | 5120          | $lr: 0.1$                                                         | 5120          | $lr: 0.3$                                                       |
| FDR           | 200           | $lr: 0.1 \quad \alpha: 1.0$                                       | 200           | $lr: 0.1 \quad \alpha: 1.0$                                     |
|               | 500           | $lr: 0.1 \quad \alpha: 0.3$                                       | 500           | $lr: 0.2 \quad \alpha: 0.3$                                     |
|               | 5120          | $lr: 0.1 \quad \alpha: 1.0$                                       | 5120          | $lr: 0.2 \quad \alpha: 1.0$                                     |
| GSS           | 200           | $lr: 0.2 \quad gmb: 128 \quad nb: 1$                              | 200           | $lr: 0.2 \quad gmb: 128 \quad nb: 1$                            |
|               | 500           | $lr: 0.1 \quad gmb: 10 \quad nb: 1$                               | 500           | $lr: 0.2 \quad gmb: 128 \quad nb: 1$                            |
|               | 5120          | $lr: 0.03 \quad gmb: 10 \quad nb: 1$                              | 5120          | $lr: 0.2 \quad gmb: 128 \quad nb: 1$                            |
| HAL           | 200           | $lr: 0.1 \quad \lambda: 0.1 \quad \beta: 0.5 \quad \gamma: 0.1$   | 200           | $lr: 0.1 \quad \lambda: 0.2 \quad \beta: 0.5 \quad \gamma: 0.1$ |
|               | 500           | $lr: 0.1 \quad \lambda: 0.1 \quad \beta: 0.3 \quad \gamma: 0.1$   | 500           | $lr: 0.1 \quad \lambda: 0.1 \quad \beta: 0.5 \quad \gamma: 0.1$ |
|               | 5120          | $lr: 0.1 \quad \lambda: 0.1 \quad \beta: 0.5 \quad \gamma: 0.1$   | 5120          | $lr: 0.1 \quad \lambda: 0.1 \quad \beta: 0.3 \quad \gamma: 0.1$ |
| DER           | 200           | $lr: 0.2 \quad \alpha: 1.0$                                       | 200           | $lr: 0.2 \quad \alpha: 1.0$                                     |
|               | 500           | $lr: 0.2 \quad \alpha: 1.0$                                       | 500           | $lr: 0.2 \quad \alpha: 0.5$                                     |
|               | 5120          | $lr: 0.2 \quad \alpha: 0.5$                                       | 5120          | $lr: 0.2 \quad \alpha: 0.5$                                     |
| DER++         | 200           | $lr: 0.1 \quad \alpha: 1.0 \quad \beta: 1.0$                      | 200           | $lr: 0.1 \quad \alpha: 1.0 \quad \beta: 0.5$                    |
|               | 500           | $lr: 0.2 \quad \alpha: 1.0 \quad \beta: 0.5$                      | 500           | $lr: 0.2 \quad \alpha: 0.5 \quad \beta: 1.0$                    |
|               | 5120          | $lr: 0.2 \quad \alpha: 0.5 \quad \beta: 1.0$                      | 5120          | $lr: 0.2 \quad \alpha: 0.5 \quad \beta: 0.5$                    |
| <i>Method</i> | <i>Buffer</i> | <b>Sequential MNIST</b>                                           | <i>Buffer</i> | <b>Sequential CIFAR-10</b>                                      |
| SGD           | –             | $lr: 0.03$                                                        | –             | $lr: 0.1$                                                       |
| oEWC          | –             | $lr: 0.03 \quad \lambda: 90 \quad \gamma: 1.0$                    | –             | $lr: 0.03 \quad \lambda: 10 \quad \gamma: 1.0$                  |
| SI            | –             | $lr: 0.1 \quad c: 1.0 \quad \xi: 0.9$                             | –             | $lr: 0.03 \quad c: 0.5 \quad \xi: 1.0$                          |
| LwF           | –             | $lr: 0.03 \quad \alpha: 1 \quad T: 2.0 \quad wd: 0.0005$          | –             | $lr: 0.03 \quad \alpha: 0.5 \quad T: 2.0$                       |
| PNN           | –             | $lr: 0.1$                                                         | –             | $lr: 0.03$                                                      |
| ER            | 200           | $lr: 0.01$                                                        | 200           | $lr: 0.1$                                                       |
|               | 500           | $lr: 0.1$                                                         | 500           | $lr: 0.1$                                                       |
|               | 5120          | $lr: 0.1$                                                         | 5120          | $lr: 0.1$                                                       |
| MER           | 200           | $lr: 0.1 \quad \beta: 1 \quad \gamma: 1 \quad nb: 1 \quad bs: 1$  |               |                                                                 |
|               | 500           | $lr: 0.1 \quad \beta: 1 \quad \gamma: 1 \quad nb: 1 \quad bs: 1$  |               |                                                                 |
|               | 5120          | $lr: 0.03 \quad \beta: 1 \quad \gamma: 1 \quad nb: 1 \quad bs: 1$ |               |                                                                 |
| GEM           | 200           | $lr: 0.01 \quad \gamma: 1.0$                                      | 200           | $lr: 0.03 \quad \gamma: 0.5$                                    |
|               | 500           | $lr: 0.03 \quad \gamma: 0.5$                                      | 500           | $lr: 0.03 \quad \gamma: 0.5$                                    |
|               | 5120          | $lr: 0.1 \quad \gamma: 1.0$                                       | 5120          | $lr: 0.03 \quad \gamma: 0.5$                                    |

| <i>Method</i> | <i>Buffer</i> | <b>Sequential MNIST</b>                                      | <i>Buffer</i> | <b>Sequential CIFAR-10</b>                                                 |
|---------------|---------------|--------------------------------------------------------------|---------------|----------------------------------------------------------------------------|
| A-GEM         | 200           | <i>lr</i> : 0.1                                              | 200           | <i>lr</i> : 0.03                                                           |
|               | 500           | <i>lr</i> : 0.1                                              | 500           | <i>lr</i> : 0.03                                                           |
|               | 5120          | <i>lr</i> : 0.1                                              | 5120          | <i>lr</i> : 0.03                                                           |
| iCaRL         | 200           | <i>lr</i> : 0.1 <i>wd</i> : 0                                | 200           | <i>lr</i> : 0.1 <i>wd</i> : $10^{-5}$                                      |
|               | 500           | <i>lr</i> : 0.1 <i>wd</i> : 0                                | 500           | <i>lr</i> : 0.1 <i>wd</i> : $10^{-5}$                                      |
|               | 5120          | <i>lr</i> : 0.1 <i>wd</i> : 0                                | 5120          | <i>lr</i> : 0.03 <i>wd</i> : $10^{-5}$                                     |
| FDR           | 200           | <i>lr</i> : 0.03 $\alpha$ : 0.5                              | 200           | <i>lr</i> : 0.03 $\alpha$ : 0.3                                            |
|               | 500           | <i>lr</i> : 0.1 $\alpha$ : 0.2                               | 500           | <i>lr</i> : 0.03 $\alpha$ : 1.0                                            |
|               | 5120          | <i>lr</i> : 0.1 $\alpha$ : 0.2                               | 5120          | <i>lr</i> : 0.03 $\alpha$ : 0.3                                            |
| GSS           | 200           | <i>lr</i> : 0.1 <i>gmbs</i> : 10 <i>nb</i> : 1               | 200           | <i>lr</i> : 0.03 <i>gmbs</i> : 32 <i>nb</i> : 1                            |
|               | 500           | <i>lr</i> : 0.1 <i>gmbs</i> : 10 <i>nb</i> : 1               | 500           | <i>lr</i> : 0.03 <i>gmbs</i> : 32 <i>nb</i> : 1                            |
|               | 5120          | <i>lr</i> : 0.1 <i>gmbs</i> : 10 <i>nb</i> : 1               | 5120          | <i>lr</i> : 0.03 <i>gmbs</i> : 32 <i>nb</i> : 1                            |
| HAL           | 200           | <i>lr</i> : 0.1 $\lambda$ : 0.1 $\beta$ : 0.7 $\gamma$ : 0.5 | 200           | <i>lr</i> : 0.03 $\lambda$ : 0.2 $\beta$ : 0.5<br>$\gamma$ : 0.1           |
|               | 500           | <i>lr</i> : 0.1 $\lambda$ : 0.1 $\beta$ : 0.2 $\gamma$ : 0.5 | 500           | <i>lr</i> : 0.03 $\lambda$ : 0.1 $\beta$ : 0.3<br>$\gamma$ : 0.1           |
|               | 5120          | <i>lr</i> : 0.1 $\lambda$ : 0.1 $\beta$ : 0.7 $\gamma$ : 0.5 | 5120          | <i>lr</i> : 0.03 $\lambda$ : 0.1 $\beta$ : 0.3<br>$\gamma$ : 0.1           |
| DER           | 200           | <i>lr</i> : 0.03 $\alpha$ : 0.2                              | 200           | <i>lr</i> : 0.03 $\alpha$ : 0.3                                            |
|               | 500           | <i>lr</i> : 0.03 $\alpha$ : 1.0                              | 500           | <i>lr</i> : 0.03 $\alpha$ : 0.3                                            |
|               | 5120          | <i>lr</i> : 0.1 $\alpha$ : 0.5                               | 5120          | <i>lr</i> : 0.03 $\alpha$ : 0.3                                            |
| DER++         | 200           | <i>lr</i> : 0.03 $\alpha$ : 0.2 $\beta$ : 1.0                | 200           | <i>lr</i> : 0.03 $\alpha$ : 0.1 $\beta$ : 0.5                              |
|               | 500           | <i>lr</i> : 0.03 $\alpha$ : 1.0 $\beta$ : 0.5                | 500           | <i>lr</i> : 0.03 $\alpha$ : 0.2 $\beta$ : 0.5                              |
|               | 5120          | <i>lr</i> : 0.1 $\alpha$ : 0.2 $\beta$ : 0.5                 | 5120          | <i>lr</i> : 0.03 $\alpha$ : 0.1 $\beta$ : 1.0                              |
| <i>Method</i> | <i>Buffer</i> | <b>Sequential Tiny ImageNet</b>                              | <i>Buffer</i> | <b>MNIST-360</b>                                                           |
| SGD           | –             | <i>lr</i> : 0.03                                             | –             | <i>lr</i> : 0.1 <i>bs</i> : 4                                              |
| oEWC          | –             | <i>lr</i> : 0.03 $\lambda$ : 25 $\gamma$ : 1.0               |               |                                                                            |
| SI            | –             | <i>lr</i> : 0.03 <i>c</i> : 0.5 $\xi$ : 1.0                  |               |                                                                            |
| LwF           | –             | <i>lr</i> : 0.01 $\alpha$ : 1.0 <i>T</i> : 2.0               |               |                                                                            |
| PNN           | –             | <i>lr</i> : 0.03                                             |               |                                                                            |
| ER            | 200           | <i>lr</i> : 0.1                                              | 200           | <i>lr</i> : 0.2 <i>bs</i> : 1 <i>mbs</i> : 16                              |
|               | 500           | <i>lr</i> : 0.03                                             | 500           | <i>lr</i> : 0.2 <i>bs</i> : 1 <i>mbs</i> : 16                              |
|               | 5120          | <i>lr</i> : 0.1                                              | 1000          | <i>lr</i> : 0.2 <i>bs</i> : 4 <i>mbs</i> : 16                              |
| MER           |               |                                                              | 200           | <i>lr</i> : 0.2 <i>mbs</i> : 128 $\beta$ : 1<br>$\gamma$ : 1 <i>nb</i> : 3 |
|               |               |                                                              | 500           | <i>lr</i> : 0.1 <i>mbs</i> : 128 $\beta$ : 1<br>$\gamma$ : 1 <i>nb</i> : 3 |
|               |               |                                                              | 1000          | <i>lr</i> : 0.2 <i>mbs</i> : 128 $\beta$ : 1<br>$\gamma$ : 1 <i>nb</i> : 3 |
| A-GEM         | 200           | <i>lr</i> : 0.01                                             | 200           | <i>lr</i> : 0.1 <i>bs</i> : 16 <i>mbs</i> : 128                            |
|               | 500           | <i>lr</i> : 0.01                                             | 500           | <i>lr</i> : 0.1 <i>bs</i> : 16 <i>mbs</i> : 128                            |
|               | 5120          | <i>lr</i> : 0.01                                             | 1000          | <i>lr</i> : 0.1 <i>bs</i> : 4 <i>mbs</i> : 128                             |
| iCaRL         | 200           | <i>lr</i> : 0.03 <i>wd</i> : $10^{-5}$                       |               |                                                                            |
|               | 500           | <i>lr</i> : 0.03 <i>wd</i> : $10^{-5}$                       |               |                                                                            |
|               | 5120          | <i>lr</i> : 0.03 <i>wd</i> : $10^{-5}$                       |               |                                                                            |

| <i>Method</i> | <i>Buffer</i> | <b>Sequential Tiny Imagenet</b>               | <i>Buffer</i> | <b>MNIST-360</b>                              |
|---------------|---------------|-----------------------------------------------|---------------|-----------------------------------------------|
| FDR           | 200           | <i>lr</i> : 0.03 $\alpha$ : 0.3               |               |                                               |
|               | 500           | <i>lr</i> : 0.03 $\alpha$ : 1.0               |               |                                               |
|               | 5120          | <i>lr</i> : 0.03 $\alpha$ : 0.3               |               |                                               |
| GSS           |               |                                               | 200           | <i>lr</i> : 0.2 <i>bs</i> : 1 <i>mbs</i> : 16 |
|               |               |                                               | 500           | <i>lr</i> : 0.2 <i>bs</i> : 1 <i>mbs</i> : 16 |
|               |               |                                               | 1000          | <i>lr</i> : 0.2 <i>bs</i> : 4 <i>mbs</i> : 16 |
| DER           | 200           | <i>lr</i> : 0.03 $\alpha$ : 0.1               | 200           | <i>lr</i> : 0.1 <i>bs</i> : 16                |
|               |               |                                               |               | <i>mbs</i> : 64 $\alpha$ : 0.5                |
|               | 500           | <i>lr</i> : 0.03 $\alpha$ : 0.1               | 500           | <i>lr</i> : 0.2 <i>bs</i> : 16                |
|               |               |                                               |               | <i>mbs</i> : 16 $\alpha$ : 0.5                |
|               | 5120          | <i>lr</i> : 0.03 $\alpha$ : 0.1               | 1000          | <i>lr</i> : 0.1 <i>bs</i> : 8                 |
|               |               |                                               |               | <i>mbs</i> : 16 $\alpha$ : 0.5                |
| DER++         | 200           | <i>lr</i> : 0.03 $\alpha$ : 0.1 $\beta$ : 1.0 | 200           | <i>lr</i> : 0.2 <i>bs</i> : 16                |
|               |               |                                               |               | <i>mbs</i> : 16 $\alpha$ : 0.5 $\beta$ : 1.0  |
|               | 500           | <i>lr</i> : 0.03 $\alpha$ : 0.2 $\beta$ : 0.5 | 500           | <i>lr</i> : 0.2 <i>bs</i> : 16                |
|               |               |                                               |               | <i>mbs</i> : 16 $\alpha$ : 0.5 $\beta$ : 1.0  |
|               | 5120          | <i>lr</i> : 0.03 $\alpha$ : 0.1 $\beta$ : 0.5 | 1000          | <i>lr</i> : 0.2 <i>bs</i> : 16                |
|               |               |                                               |               | <i>mbs</i> : 128 $\alpha$ : 0.2 $\beta$ : 1.0 |

Table 9: Hyperparameters selected for our experiments.

## G.2 All values

In the following, we provide a list of all the parameter combinations that were considered (Table 10). Note that the same parameters are searched for all examined buffer sizes.

| Permuted MNIST |             |                           | Rotated MNIST |             |                                | Sequential Tiny ImageNet |            |                            |
|----------------|-------------|---------------------------|---------------|-------------|--------------------------------|--------------------------|------------|----------------------------|
| <i>Method</i>  | <i>Par</i>  | <i>Values</i>             | <i>Method</i> | <i>Par</i>  | <i>Values</i>                  | <i>Method</i>            | <i>Par</i> | <i>Values</i>              |
| SGD/JOINT      | <i>lr</i>   | [0.03, 0.1, 0.2]          | SGD           | <i>lr</i>   | [0.03, 0.1, 0.2]               | SGD                      | <i>lr</i>  | [0.01, 0.03, 0.1]          |
| oEWC           | <i>lr</i>   | [0.1, 0.01]               | oEWC          | <i>lr</i>   | [0.01, 0.1]                    | oEWC                     | <i>lr</i>  | [0.01, 0.03]               |
|                | $\lambda$   | [0.1, 1, 10, 30, 90, 100] |               | $\lambda$   | [0.1, 0.7, 1, 10, 30, 90, 100] |                          | $\lambda$  | [10, 25, 30, 90, 100]      |
|                | $\gamma$    | [0.9, 1.0]                |               | $\gamma$    | [0.9, 1.0]                     |                          | $\gamma$   | [0.9, 0.95, 1.0]           |
| SI             | <i>lr</i>   | [0.01, 0.1]               | SI            | <i>lr</i>   | [0.01, 0.1]                    | SI                       | <i>lr</i>  | [0.01, 0.03]               |
|                | <i>c</i>    | [0.5, 1.0]                |               | <i>c</i>    | [0.5, 1.0]                     |                          | <i>c</i>   | [0.5]                      |
|                | $\xi$       | [0.9, 1.0]                |               | $\xi$       | [0.9, 1.0]                     |                          | $\xi$      | [1.0]                      |
| ER             | <i>lr</i>   | [0.03, 0.1, 0.2]          | ER            | <i>lr</i>   | [0.1, 0.2]                     | LwF                      | <i>lr</i>  | [0.01, 0.03]               |
| GEM            | <i>lr</i>   | [0.01, 0.1, 0.3]          | GEM           | <i>lr</i>   | [0.01, 0.3, 0.1]               |                          | $\alpha$   | [0.3, 1, 3]                |
|                | $\gamma$    | [0.1, 0.5, 1]             |               | $\gamma$    | [0.1, 0.5, 1]                  |                          | <i>T</i>   | [2.0, 4.0]                 |
| A-GEM          | <i>lr</i>   | [0.01, 0.1, 0.3]          | A-GEM         | <i>lr</i>   | [0.01, 0.1, 0.3]               |                          | <i>wd</i>  | [0.00005, 0.00001]         |
| GSS            | <i>lr</i>   | [0.03, 0.1, 0.2]          | GSS           | <i>lr</i>   | [0.03, 0.1, 0.2]               | PNN                      | <i>lr</i>  | [0.03, 0.1]                |
|                | <i>gmbs</i> | [10, 64, 128]             |               | <i>gmbs</i> | [10, 64, 128]                  | ER                       | <i>lr</i>  | [0.01, 0.03, 0.1]          |
|                | <i>nb</i>   | [1]                       |               | <i>nb</i>   | [1]                            | A-GEM                    | <i>lr</i>  | [0.003, 0.01]              |
| HAL            | <i>lr</i>   | [0.03, 0.1, 0.3]          | HAL           | <i>lr</i>   | [0.03, 0.1, 0.3]               | iCaRL                    | <i>lr</i>  | [0.01, 0.03, 0.1]          |
|                | $\lambda$   | [0.1, 0.2]                |               | $\lambda$   | [0.1, 0.2]                     | iCaRL                    | <i>wd</i>  | [0.00005, 0.00001]         |
|                | $\beta$     | [0.3, 0.5]                |               | $\beta$     | [0.3, 0.5]                     |                          | <i>lr</i>  | [0.01, 0.03, 0.1]          |
|                | $\gamma$    | [0.1]                     |               | $\gamma$    | [0.1]                          | FDR                      | $\alpha$   | [0.03, 0.1, 0.3, 1.0, 3.0] |
| DER            | <i>lr</i>   | [0.1, 0.2]                | DER           | <i>lr</i>   | [0.1, 0.2]                     | DER                      | <i>lr</i>  | [0.01, 0.03, 0.1]          |
|                | $\alpha$    | [0.5, 1.0]                |               | $\alpha$    | [0.5, 1.0]                     |                          | $\alpha$   | [0.1, 0.5, 1.0]            |
| DER++          | <i>lr</i>   | [0.1, 0.2]                | DER++         | <i>lr</i>   | [0.1, 0.2]                     | DER++                    | <i>lr</i>  | [0.01, 0.03]               |
|                | $\alpha$    | [0.5, 1.0]                |               | $\alpha$    | [0.5, 1.0]                     |                          | $\alpha$   | [0.1, 0.2, 0.5, 1.0]       |
|                | $\beta$     | [0.5, 1.0]                |               | $\beta$     | [0.5, 1.0]                     |                          | $\beta$    | [0.5, 1.0]                 |

| Sequential MNIST |                 |                       | Sequential CIFAR-10 |                  |                            | MNIST-360 |                                         |                                                                      |                                                            |                                                                          |                                                                          |                                                                          |                                                                          |                                                                          |                                              |                   |                      |          |                 |     |                                         |                                                                      |       |                  |                   |         |                       |                                           |                   |                                   |                                                            |                 |     |                                         |                                                                      |       |                  |                   |       |                                              |                                                                          |     |                                   |                                                            |          |                                         |                                                                      |                                   |                                                            |                   |                   |       |                                              |      |                                                                          |                                                            |                                              |                                                                          |             |     |                                   |                                                            |       |                                              |                                                                          |                 |                                   |                                                            |          |          |                                              |                                                                          |                  |       |                                              |                                                                          |             |       |                                              |                                                                          |                                   |                                                            |                   |          |                                   |                                                            |       |                                   |                                                            |                                                                          |          |          |                            |       |                                              |                                                                          |                   |      |                                   |                                                            |       |                   |                   |                                   |                                                            |                                                                          |                            |             |                                              |                                                                          |                            |       |                                              |                                                                          |     |      |                   |             |      |                                              |      |                                                                          |                                                                          |                                              |                                                                          |        |       |       |                                              |                                                                          |                   |       |                                              |                                                                          |      |      |     |                                              |                                                                          |                                              |                                                                          |       |                                              |                                                                          |       |                                              |                                                                          |                   |       |     |                                              |                                                                          |       |                                              |                                                                          |           |      |                  |     |            |                 |       |                                              |                                                                          |           |                                                                          |         |                  |       |       |                                              |                                                                          |         |                                              |                                              |                                                                          |                   |            |                                              |                                                                          |          |                 |       |          |                                              |                                                                          |                                                                          |                                                                          |                 |      |             |       |                   |                   |       |                                              |                                                                          |          |                 |       |          |                 |                 |                                              |                                                                          |                                              |                                                                          |             |       |             |             |         |                                              |                                                                          |                   |                 |                                              |                                                                          |                                                                          |                 |                                              |                                                                          |         |                 |       |                                              |            |                                                                          |                                              |                                                                          |       |         |            |             |            |                                              |                                                                          |                                                                          |
|------------------|-----------------|-----------------------|---------------------|------------------|----------------------------|-----------|-----------------------------------------|----------------------------------------------------------------------|------------------------------------------------------------|--------------------------------------------------------------------------|--------------------------------------------------------------------------|--------------------------------------------------------------------------|--------------------------------------------------------------------------|--------------------------------------------------------------------------|----------------------------------------------|-------------------|----------------------|----------|-----------------|-----|-----------------------------------------|----------------------------------------------------------------------|-------|------------------|-------------------|---------|-----------------------|-------------------------------------------|-------------------|-----------------------------------|------------------------------------------------------------|-----------------|-----|-----------------------------------------|----------------------------------------------------------------------|-------|------------------|-------------------|-------|----------------------------------------------|--------------------------------------------------------------------------|-----|-----------------------------------|------------------------------------------------------------|----------|-----------------------------------------|----------------------------------------------------------------------|-----------------------------------|------------------------------------------------------------|-------------------|-------------------|-------|----------------------------------------------|------|--------------------------------------------------------------------------|------------------------------------------------------------|----------------------------------------------|--------------------------------------------------------------------------|-------------|-----|-----------------------------------|------------------------------------------------------------|-------|----------------------------------------------|--------------------------------------------------------------------------|-----------------|-----------------------------------|------------------------------------------------------------|----------|----------|----------------------------------------------|--------------------------------------------------------------------------|------------------|-------|----------------------------------------------|--------------------------------------------------------------------------|-------------|-------|----------------------------------------------|--------------------------------------------------------------------------|-----------------------------------|------------------------------------------------------------|-------------------|----------|-----------------------------------|------------------------------------------------------------|-------|-----------------------------------|------------------------------------------------------------|--------------------------------------------------------------------------|----------|----------|----------------------------|-------|----------------------------------------------|--------------------------------------------------------------------------|-------------------|------|-----------------------------------|------------------------------------------------------------|-------|-------------------|-------------------|-----------------------------------|------------------------------------------------------------|--------------------------------------------------------------------------|----------------------------|-------------|----------------------------------------------|--------------------------------------------------------------------------|----------------------------|-------|----------------------------------------------|--------------------------------------------------------------------------|-----|------|-------------------|-------------|------|----------------------------------------------|------|--------------------------------------------------------------------------|--------------------------------------------------------------------------|----------------------------------------------|--------------------------------------------------------------------------|--------|-------|-------|----------------------------------------------|--------------------------------------------------------------------------|-------------------|-------|----------------------------------------------|--------------------------------------------------------------------------|------|------|-----|----------------------------------------------|--------------------------------------------------------------------------|----------------------------------------------|--------------------------------------------------------------------------|-------|----------------------------------------------|--------------------------------------------------------------------------|-------|----------------------------------------------|--------------------------------------------------------------------------|-------------------|-------|-----|----------------------------------------------|--------------------------------------------------------------------------|-------|----------------------------------------------|--------------------------------------------------------------------------|-----------|------|------------------|-----|------------|-----------------|-------|----------------------------------------------|--------------------------------------------------------------------------|-----------|--------------------------------------------------------------------------|---------|------------------|-------|-------|----------------------------------------------|--------------------------------------------------------------------------|---------|----------------------------------------------|----------------------------------------------|--------------------------------------------------------------------------|-------------------|------------|----------------------------------------------|--------------------------------------------------------------------------|----------|-----------------|-------|----------|----------------------------------------------|--------------------------------------------------------------------------|--------------------------------------------------------------------------|--------------------------------------------------------------------------|-----------------|------|-------------|-------|-------------------|-------------------|-------|----------------------------------------------|--------------------------------------------------------------------------|----------|-----------------|-------|----------|-----------------|-----------------|----------------------------------------------|--------------------------------------------------------------------------|----------------------------------------------|--------------------------------------------------------------------------|-------------|-------|-------------|-------------|---------|----------------------------------------------|--------------------------------------------------------------------------|-------------------|-----------------|----------------------------------------------|--------------------------------------------------------------------------|--------------------------------------------------------------------------|-----------------|----------------------------------------------|--------------------------------------------------------------------------|---------|-----------------|-------|----------------------------------------------|------------|--------------------------------------------------------------------------|----------------------------------------------|--------------------------------------------------------------------------|-------|---------|------------|-------------|------------|----------------------------------------------|--------------------------------------------------------------------------|--------------------------------------------------------------------------|
| Method           | Par             | Values                | Method              | Par              | Values                     | Method    | Par                                     | Values                                                               |                                                            |                                                                          |                                                                          |                                                                          |                                                                          |                                                                          |                                              |                   |                      |          |                 |     |                                         |                                                                      |       |                  |                   |         |                       |                                           |                   |                                   |                                                            |                 |     |                                         |                                                                      |       |                  |                   |       |                                              |                                                                          |     |                                   |                                                            |          |                                         |                                                                      |                                   |                                                            |                   |                   |       |                                              |      |                                                                          |                                                            |                                              |                                                                          |             |     |                                   |                                                            |       |                                              |                                                                          |                 |                                   |                                                            |          |          |                                              |                                                                          |                  |       |                                              |                                                                          |             |       |                                              |                                                                          |                                   |                                                            |                   |          |                                   |                                                            |       |                                   |                                                            |                                                                          |          |          |                            |       |                                              |                                                                          |                   |      |                                   |                                                            |       |                   |                   |                                   |                                                            |                                                                          |                            |             |                                              |                                                                          |                            |       |                                              |                                                                          |     |      |                   |             |      |                                              |      |                                                                          |                                                                          |                                              |                                                                          |        |       |       |                                              |                                                                          |                   |       |                                              |                                                                          |      |      |     |                                              |                                                                          |                                              |                                                                          |       |                                              |                                                                          |       |                                              |                                                                          |                   |       |     |                                              |                                                                          |       |                                              |                                                                          |           |      |                  |     |            |                 |       |                                              |                                                                          |           |                                                                          |         |                  |       |       |                                              |                                                                          |         |                                              |                                              |                                                                          |                   |            |                                              |                                                                          |          |                 |       |          |                                              |                                                                          |                                                                          |                                                                          |                 |      |             |       |                   |                   |       |                                              |                                                                          |          |                 |       |          |                 |                 |                                              |                                                                          |                                              |                                                                          |             |       |             |             |         |                                              |                                                                          |                   |                 |                                              |                                                                          |                                                                          |                 |                                              |                                                                          |         |                 |       |                                              |            |                                                                          |                                              |                                                                          |       |         |            |             |            |                                              |                                                                          |                                                                          |
| SGD              | $lr$            | [0.01, 0.03, 0.1]     | SGD                 | $lr$             | [0.01, 0.03, 0.1]          | SGD       | $lr$<br>$bs$                            | [0.1, 0.2]<br>[1, 4, 8, 16]                                          |                                                            |                                                                          |                                                                          |                                                                          |                                                                          |                                                                          |                                              |                   |                      |          |                 |     |                                         |                                                                      |       |                  |                   |         |                       |                                           |                   |                                   |                                                            |                 |     |                                         |                                                                      |       |                  |                   |       |                                              |                                                                          |     |                                   |                                                            |          |                                         |                                                                      |                                   |                                                            |                   |                   |       |                                              |      |                                                                          |                                                            |                                              |                                                                          |             |     |                                   |                                                            |       |                                              |                                                                          |                 |                                   |                                                            |          |          |                                              |                                                                          |                  |       |                                              |                                                                          |             |       |                                              |                                                                          |                                   |                                                            |                   |          |                                   |                                                            |       |                                   |                                                            |                                                                          |          |          |                            |       |                                              |                                                                          |                   |      |                                   |                                                            |       |                   |                   |                                   |                                                            |                                                                          |                            |             |                                              |                                                                          |                            |       |                                              |                                                                          |     |      |                   |             |      |                                              |      |                                                                          |                                                                          |                                              |                                                                          |        |       |       |                                              |                                                                          |                   |       |                                              |                                                                          |      |      |     |                                              |                                                                          |                                              |                                                                          |       |                                              |                                                                          |       |                                              |                                                                          |                   |       |     |                                              |                                                                          |       |                                              |                                                                          |           |      |                  |     |            |                 |       |                                              |                                                                          |           |                                                                          |         |                  |       |       |                                              |                                                                          |         |                                              |                                              |                                                                          |                   |            |                                              |                                                                          |          |                 |       |          |                                              |                                                                          |                                                                          |                                                                          |                 |      |             |       |                   |                   |       |                                              |                                                                          |          |                 |       |          |                 |                 |                                              |                                                                          |                                              |                                                                          |             |       |             |             |         |                                              |                                                                          |                   |                 |                                              |                                                                          |                                                                          |                 |                                              |                                                                          |         |                 |       |                                              |            |                                                                          |                                              |                                                                          |       |         |            |             |            |                                              |                                                                          |                                                                          |
| oEWC             | $lr$            | [0.01, 0.03, 0.1]     | oEWC                | $lr$             | [0.03, 0.1]                | ER        | $mbs$<br>$lr$<br>$bs$                   | [16, 64, 128]<br>[0.1, 0.2]<br>[1, 4, 8, 16]                         |                                                            |                                                                          |                                                                          |                                                                          |                                                                          |                                                                          |                                              |                   |                      |          |                 |     |                                         |                                                                      |       |                  |                   |         |                       |                                           |                   |                                   |                                                            |                 |     |                                         |                                                                      |       |                  |                   |       |                                              |                                                                          |     |                                   |                                                            |          |                                         |                                                                      |                                   |                                                            |                   |                   |       |                                              |      |                                                                          |                                                            |                                              |                                                                          |             |     |                                   |                                                            |       |                                              |                                                                          |                 |                                   |                                                            |          |          |                                              |                                                                          |                  |       |                                              |                                                                          |             |       |                                              |                                                                          |                                   |                                                            |                   |          |                                   |                                                            |       |                                   |                                                            |                                                                          |          |          |                            |       |                                              |                                                                          |                   |      |                                   |                                                            |       |                   |                   |                                   |                                                            |                                                                          |                            |             |                                              |                                                                          |                            |       |                                              |                                                                          |     |      |                   |             |      |                                              |      |                                                                          |                                                                          |                                              |                                                                          |        |       |       |                                              |                                                                          |                   |       |                                              |                                                                          |      |      |     |                                              |                                                                          |                                              |                                                                          |       |                                              |                                                                          |       |                                              |                                                                          |                   |       |     |                                              |                                                                          |       |                                              |                                                                          |           |      |                  |     |            |                 |       |                                              |                                                                          |           |                                                                          |         |                  |       |       |                                              |                                                                          |         |                                              |                                              |                                                                          |                   |            |                                              |                                                                          |          |                 |       |          |                                              |                                                                          |                                                                          |                                                                          |                 |      |             |       |                   |                   |       |                                              |                                                                          |          |                 |       |          |                 |                 |                                              |                                                                          |                                              |                                                                          |             |       |             |             |         |                                              |                                                                          |                   |                 |                                              |                                                                          |                                                                          |                 |                                              |                                                                          |         |                 |       |                                              |            |                                                                          |                                              |                                                                          |       |         |            |             |            |                                              |                                                                          |                                                                          |
|                  | $\lambda$       | [10, 25, 30, 90, 100] |                     | $\gamma$         | [0.9, 1.0]                 |           | SI                                      | $lr$                                                                 | [0.01, 0.03, 0.1]                                          | SI                                                                       | $lr$                                                                     | [0.01, 0.03, 0.1]                                                        | MER                                                                      | $mbs$<br>$lr$<br>$\beta$<br>$\gamma$<br>$nb$                             | [128]<br>[0.1, 0.2]<br>[1.0]<br>[1.0]<br>[1] | $c$               | [0.3, 0.5, 0.7, 1.0] | $\xi$    | [0.9, 1.0]      | LwF | $lr$                                    | [0.01, 0.03, 0.1]                                                    | LwF   | $lr$             | [0.01, 0.03, 0.1] | A-GEM-R | $mbs$<br>$lr$<br>$bs$ | [16, 64, 128]<br>[0.1, 0.2]<br>[1, 4, 16] | $\alpha$          | [0.3, 0.5, 0.7, 1.0]              | $\alpha$                                                   | [0.3, 1, 3, 10] | $T$ | [2.0, 4.0]                              | $T$                                                                  | [2.0] | $\gamma$<br>$nb$ | [1.0]<br>[1]      | PNN   | $lr$                                         | [0.01, 0.03, 0.1]                                                        | PNN | $lr$                              | [0.03, 0.1]                                                | GSS      | $mbs$<br>$lr$<br>$bs$<br>$gmbs$<br>$nb$ | [16, 64, 128]<br>[0.1, 0.2]<br>[1, 4, 8, 16]<br>[16, 64, 128]<br>[1] | ER                                | $lr$                                                       | [0.03, 0.01, 0.1] | ER                | $lr$  | [0.01, 0.03, 0.1]                            | DER  | $mbs$<br>$lr$<br>$bs$<br>$\alpha$                                        | [16, 64, 128]<br>[0.1, 0.2]<br>[1, 4, 8, 16]<br>[0.5, 1.0] | MER                                          | $lr$                                                                     | [0.03, 0.1] | GEM | $lr$                              | [0.01, 0.03, 0.1]                                          | DER++ | $mbs$<br>$lr$<br>$bs$<br>$\alpha$<br>$\beta$ | [16, 64, 128]<br>[0.1, 0.2]<br>[1, 4, 8, 16]<br>[0.2, 0.5]<br>[0.5, 1.0] | $\beta, \gamma$ | [1.0]                             | $\gamma$                                                   | [0.5, 1] | DER      | $mbs$<br>$lr$<br>$bs$<br>$\alpha$            | [16, 64, 128]<br>[0.1, 0.2]<br>[1, 4, 8, 16]<br>[0.5, 1.0]               | $nb$             | [1]   | A-GEM                                        | $lr$                                                                     | [0.03, 0.1] | DER++ | $mbs$<br>$lr$<br>$bs$<br>$\alpha$<br>$\beta$ | [16, 64, 128]<br>[0.1, 0.2]<br>[1, 4, 8, 16]<br>[0.2, 0.5]<br>[0.5, 1.0] | GEM                               | $lr$                                                       | [0.01, 0.03, 0.1] | iCaRL    | $lr$                              | [0.01, 0.03, 0.1]                                          | DER   | $mbs$<br>$lr$<br>$bs$<br>$\alpha$ | [16, 64, 128]<br>[0.1, 0.2]<br>[1, 4, 8, 16]<br>[0.5, 1.0] | $\gamma$                                                                 | [0.5, 1] | $wd$     | [0.0001, 0.0005]           | DER++ | $mbs$<br>$lr$<br>$bs$<br>$\alpha$<br>$\beta$ | [16, 64, 128]<br>[0.1, 0.2]<br>[1, 4, 8, 16]<br>[0.2, 0.5]<br>[0.5, 1.0] | A-GEM             | $lr$ | [0.03, 0.1]                       | FDR                                                        | $lr$  | [0.01, 0.03, 0.1] | DER               | $mbs$<br>$lr$<br>$bs$<br>$\alpha$ | [16, 64, 128]<br>[0.1, 0.2]<br>[1, 4, 8, 16]<br>[0.5, 1.0] | iCaRL                                                                    | $lr$                       | [0.03, 0.1] | GSS                                          | $\alpha$                                                                 | [0.03, 0.1, 0.3, 1.0, 3.0] | DER++ | $mbs$<br>$lr$<br>$bs$<br>$\alpha$<br>$\beta$ | [16, 64, 128]<br>[0.1, 0.2]<br>[1, 4, 8, 16]<br>[0.2, 0.5]<br>[0.5, 1.0] | FDR | $lr$ | [0.03, 0.1]       | HAL         | $lr$ | [0.01, 0.03, 0.1]                            | DER  | $mbs$<br>$lr$<br>$bs$<br>$\alpha$<br>$\beta$                             | [16, 64, 128]<br>[0.1, 0.2]<br>[1, 4, 8, 16]<br>[0.2, 0.5]<br>[0.5, 1.0] | $\alpha$                                     | [0.2, 0.5, 1.0]                                                          | $gmbs$ | [32]  | DER++ | $mbs$<br>$lr$<br>$bs$<br>$\alpha$<br>$\beta$ | [16, 64, 128]<br>[0.1, 0.2]<br>[1, 4, 8, 16]<br>[0.2, 0.5]<br>[0.5, 1.0] | GSS               | $lr$  | [0.03, 0.1]                                  | HAL                                                                      | $nb$ | [1]  | DER | $mbs$<br>$lr$<br>$bs$<br>$\alpha$<br>$\beta$ | [16, 64, 128]<br>[0.1, 0.2]<br>[1, 4, 8, 16]<br>[0.2, 0.5]<br>[0.5, 1.0] | $gmbs$                                       | [10]                                                                     | DER   | $lr$                                         | [0.01, 0.03, 0.1]                                                        | DER++ | $mbs$<br>$lr$<br>$bs$<br>$\alpha$<br>$\beta$ | [16, 64, 128]<br>[0.1, 0.2]<br>[1, 4, 8, 16]<br>[0.2, 0.5]<br>[0.5, 1.0] | $nb$              | [1]   | DER | $\lambda$                                    | [0.1, 0.5]                                                               | DER++ | $mbs$<br>$lr$<br>$bs$<br>$\alpha$<br>$\beta$ | [16, 64, 128]<br>[0.1, 0.2]<br>[1, 4, 8, 16]<br>[0.2, 0.5]<br>[0.5, 1.0] | HAL       | $lr$ | [0.03, 0.1, 0.2] | DER | $\beta$    | [0.2, 0.3, 0.5] | DER++ | $mbs$<br>$lr$<br>$bs$<br>$\alpha$<br>$\beta$ | [16, 64, 128]<br>[0.1, 0.2]<br>[1, 4, 8, 16]<br>[0.2, 0.5]<br>[0.5, 1.0] | $\lambda$ | [0.1, 0.5]                                                               | DER     | $\gamma$         | [0.1] | DER++ | $mbs$<br>$lr$<br>$bs$<br>$\alpha$<br>$\beta$ | [16, 64, 128]<br>[0.1, 0.2]<br>[1, 4, 8, 16]<br>[0.2, 0.5]<br>[0.5, 1.0] | $\beta$ | [0.2, 0.5, 0.7]                              | DER                                          | $lr$                                                                     | [0.01, 0.03, 0.1] | DER++      | $mbs$<br>$lr$<br>$bs$<br>$\alpha$<br>$\beta$ | [16, 64, 128]<br>[0.1, 0.2]<br>[1, 4, 8, 16]<br>[0.2, 0.5]<br>[0.5, 1.0] | $\gamma$ | [0.1, 0.5]      | DER   | $\alpha$ | [0.2, 0.5, 1.0]                              | DER++                                                                    | $mbs$<br>$lr$<br>$bs$<br>$\alpha$<br>$\beta$                             | [16, 64, 128]<br>[0.1, 0.2]<br>[1, 4, 8, 16]<br>[0.2, 0.5]<br>[0.5, 1.0] | DER             | $lr$ | [0.03, 0.1] | DER++ | $lr$              | [0.01, 0.03, 0.1] | DER++ | $mbs$<br>$lr$<br>$bs$<br>$\alpha$<br>$\beta$ | [16, 64, 128]<br>[0.1, 0.2]<br>[1, 4, 8, 16]<br>[0.2, 0.5]<br>[0.5, 1.0] | $\alpha$ | [0.2, 0.5, 1.0] | DER++ | $\alpha$ | [0.1, 0.2, 0.5] | DER++           | $mbs$<br>$lr$<br>$bs$<br>$\alpha$<br>$\beta$ | [16, 64, 128]<br>[0.1, 0.2]<br>[1, 4, 8, 16]<br>[0.2, 0.5]<br>[0.5, 1.0] | DER++                                        | $lr$                                                                     | [0.03, 0.1] | DER++ | $\beta$     | [0.5, 1.0]  | DER++   | $mbs$<br>$lr$<br>$bs$<br>$\alpha$<br>$\beta$ | [16, 64, 128]<br>[0.1, 0.2]<br>[1, 4, 8, 16]<br>[0.2, 0.5]<br>[0.5, 1.0] | $\alpha$          | [0.2, 0.5, 1.0] | DER++                                        | $\beta$                                                                  | [0.5, 1.0]                                                               | DER++           | $mbs$<br>$lr$<br>$bs$<br>$\alpha$<br>$\beta$ | [16, 64, 128]<br>[0.1, 0.2]<br>[1, 4, 8, 16]<br>[0.2, 0.5]<br>[0.5, 1.0] | $\beta$ | [0.2, 0.5, 1.0] | DER++ | $\beta$                                      | [0.5, 1.0] | DER++                                                                    | $mbs$<br>$lr$<br>$bs$<br>$\alpha$<br>$\beta$ | [16, 64, 128]<br>[0.1, 0.2]<br>[1, 4, 8, 16]<br>[0.2, 0.5]<br>[0.5, 1.0] |       |         | DER++      | $\beta$     | [0.5, 1.0] | DER++                                        | $mbs$<br>$lr$<br>$bs$<br>$\alpha$<br>$\beta$                             | [16, 64, 128]<br>[0.1, 0.2]<br>[1, 4, 8, 16]<br>[0.2, 0.5]<br>[0.5, 1.0] |
|                  | $\gamma$        | [0.9, 1.0]            |                     |                  |                            |           |                                         |                                                                      |                                                            |                                                                          |                                                                          |                                                                          |                                                                          |                                                                          |                                              |                   |                      |          |                 |     |                                         |                                                                      |       |                  |                   |         |                       |                                           |                   |                                   |                                                            |                 |     |                                         |                                                                      |       |                  |                   |       |                                              |                                                                          |     |                                   |                                                            |          |                                         |                                                                      |                                   |                                                            |                   |                   |       |                                              |      |                                                                          |                                                            |                                              |                                                                          |             |     |                                   |                                                            |       |                                              |                                                                          |                 |                                   |                                                            |          |          |                                              |                                                                          |                  |       |                                              |                                                                          |             |       |                                              |                                                                          |                                   |                                                            |                   |          |                                   |                                                            |       |                                   |                                                            |                                                                          |          |          |                            |       |                                              |                                                                          |                   |      |                                   |                                                            |       |                   |                   |                                   |                                                            |                                                                          |                            |             |                                              |                                                                          |                            |       |                                              |                                                                          |     |      |                   |             |      |                                              |      |                                                                          |                                                                          |                                              |                                                                          |        |       |       |                                              |                                                                          |                   |       |                                              |                                                                          |      |      |     |                                              |                                                                          |                                              |                                                                          |       |                                              |                                                                          |       |                                              |                                                                          |                   |       |     |                                              |                                                                          |       |                                              |                                                                          |           |      |                  |     |            |                 |       |                                              |                                                                          |           |                                                                          |         |                  |       |       |                                              |                                                                          |         |                                              |                                              |                                                                          |                   |            |                                              |                                                                          |          |                 |       |          |                                              |                                                                          |                                                                          |                                                                          |                 |      |             |       |                   |                   |       |                                              |                                                                          |          |                 |       |          |                 |                 |                                              |                                                                          |                                              |                                                                          |             |       |             |             |         |                                              |                                                                          |                   |                 |                                              |                                                                          |                                                                          |                 |                                              |                                                                          |         |                 |       |                                              |            |                                                                          |                                              |                                                                          |       |         |            |             |            |                                              |                                                                          |                                                                          |
| SI               | $lr$            | [0.01, 0.03, 0.1]     | SI                  | $lr$             | [0.01, 0.03, 0.1]          | MER       |                                         | $mbs$<br>$lr$<br>$\beta$<br>$\gamma$<br>$nb$                         | [128]<br>[0.1, 0.2]<br>[1.0]<br>[1.0]<br>[1]               |                                                                          |                                                                          |                                                                          |                                                                          |                                                                          |                                              |                   |                      |          |                 |     |                                         |                                                                      |       |                  |                   |         |                       |                                           |                   |                                   |                                                            |                 |     |                                         |                                                                      |       |                  |                   |       |                                              |                                                                          |     |                                   |                                                            |          |                                         |                                                                      |                                   |                                                            |                   |                   |       |                                              |      |                                                                          |                                                            |                                              |                                                                          |             |     |                                   |                                                            |       |                                              |                                                                          |                 |                                   |                                                            |          |          |                                              |                                                                          |                  |       |                                              |                                                                          |             |       |                                              |                                                                          |                                   |                                                            |                   |          |                                   |                                                            |       |                                   |                                                            |                                                                          |          |          |                            |       |                                              |                                                                          |                   |      |                                   |                                                            |       |                   |                   |                                   |                                                            |                                                                          |                            |             |                                              |                                                                          |                            |       |                                              |                                                                          |     |      |                   |             |      |                                              |      |                                                                          |                                                                          |                                              |                                                                          |        |       |       |                                              |                                                                          |                   |       |                                              |                                                                          |      |      |     |                                              |                                                                          |                                              |                                                                          |       |                                              |                                                                          |       |                                              |                                                                          |                   |       |     |                                              |                                                                          |       |                                              |                                                                          |           |      |                  |     |            |                 |       |                                              |                                                                          |           |                                                                          |         |                  |       |       |                                              |                                                                          |         |                                              |                                              |                                                                          |                   |            |                                              |                                                                          |          |                 |       |          |                                              |                                                                          |                                                                          |                                                                          |                 |      |             |       |                   |                   |       |                                              |                                                                          |          |                 |       |          |                 |                 |                                              |                                                                          |                                              |                                                                          |             |       |             |             |         |                                              |                                                                          |                   |                 |                                              |                                                                          |                                                                          |                 |                                              |                                                                          |         |                 |       |                                              |            |                                                                          |                                              |                                                                          |       |         |            |             |            |                                              |                                                                          |                                                                          |
|                  | $c$             | [0.3, 0.5, 0.7, 1.0]  |                     | $\xi$            | [0.9, 1.0]                 |           | LwF                                     | $lr$                                                                 | [0.01, 0.03, 0.1]                                          | LwF                                                                      | $lr$                                                                     | [0.01, 0.03, 0.1]                                                        | A-GEM-R                                                                  | $mbs$<br>$lr$<br>$bs$                                                    | [16, 64, 128]<br>[0.1, 0.2]<br>[1, 4, 16]    | $\alpha$          | [0.3, 0.5, 0.7, 1.0] | $\alpha$ | [0.3, 1, 3, 10] | $T$ | [2.0, 4.0]                              | $T$                                                                  | [2.0] | $\gamma$<br>$nb$ | [1.0]<br>[1]      |         | PNN                   | $lr$                                      | [0.01, 0.03, 0.1] | PNN                               | $lr$                                                       | [0.03, 0.1]     | GSS | $mbs$<br>$lr$<br>$bs$<br>$gmbs$<br>$nb$ | [16, 64, 128]<br>[0.1, 0.2]<br>[1, 4, 8, 16]<br>[16, 64, 128]<br>[1] | ER    | $lr$             | [0.03, 0.01, 0.1] | ER    | $lr$                                         | [0.01, 0.03, 0.1]                                                        | DER | $mbs$<br>$lr$<br>$bs$<br>$\alpha$ | [16, 64, 128]<br>[0.1, 0.2]<br>[1, 4, 8, 16]<br>[0.5, 1.0] |          | MER                                     | $lr$                                                                 | [0.03, 0.1]                       | GEM                                                        | $lr$              | [0.01, 0.03, 0.1] | DER++ | $mbs$<br>$lr$<br>$bs$<br>$\alpha$<br>$\beta$ |      | [16, 64, 128]<br>[0.1, 0.2]<br>[1, 4, 8, 16]<br>[0.2, 0.5]<br>[0.5, 1.0] | $\beta, \gamma$                                            | [1.0]                                        | $\gamma$                                                                 | [0.5, 1]    | DER | $mbs$<br>$lr$<br>$bs$<br>$\alpha$ | [16, 64, 128]<br>[0.1, 0.2]<br>[1, 4, 8, 16]<br>[0.5, 1.0] |       | $nb$                                         | [1]                                                                      | A-GEM           | $lr$                              | [0.03, 0.1]                                                | DER++    |          | $mbs$<br>$lr$<br>$bs$<br>$\alpha$<br>$\beta$ | [16, 64, 128]<br>[0.1, 0.2]<br>[1, 4, 8, 16]<br>[0.2, 0.5]<br>[0.5, 1.0] | GEM              | $lr$  | [0.01, 0.03, 0.1]                            | iCaRL                                                                    | $lr$        |       | [0.01, 0.03, 0.1]                            | DER                                                                      | $mbs$<br>$lr$<br>$bs$<br>$\alpha$ | [16, 64, 128]<br>[0.1, 0.2]<br>[1, 4, 8, 16]<br>[0.5, 1.0] | $\gamma$          | [0.5, 1] | $wd$                              | [0.0001, 0.0005]                                           |       | DER++                             | $mbs$<br>$lr$<br>$bs$<br>$\alpha$<br>$\beta$               | [16, 64, 128]<br>[0.1, 0.2]<br>[1, 4, 8, 16]<br>[0.2, 0.5]<br>[0.5, 1.0] | A-GEM    | $lr$     | [0.03, 0.1]                |       | FDR                                          | $lr$                                                                     | [0.01, 0.03, 0.1] | DER  | $mbs$<br>$lr$<br>$bs$<br>$\alpha$ | [16, 64, 128]<br>[0.1, 0.2]<br>[1, 4, 8, 16]<br>[0.5, 1.0] | iCaRL | $lr$              |                   | [0.03, 0.1]                       | GSS                                                        | $\alpha$                                                                 | [0.03, 0.1, 0.3, 1.0, 3.0] | DER++       | $mbs$<br>$lr$<br>$bs$<br>$\alpha$<br>$\beta$ | [16, 64, 128]<br>[0.1, 0.2]<br>[1, 4, 8, 16]<br>[0.2, 0.5]<br>[0.5, 1.0] | FDR                        |       | $lr$                                         | [0.03, 0.1]                                                              | HAL | $lr$ | [0.01, 0.03, 0.1] |             | DER  | $mbs$<br>$lr$<br>$bs$<br>$\alpha$<br>$\beta$ |      | [16, 64, 128]<br>[0.1, 0.2]<br>[1, 4, 8, 16]<br>[0.2, 0.5]<br>[0.5, 1.0] | $\alpha$                                                                 | [0.2, 0.5, 1.0]                              | $gmbs$                                                                   | [32]   | DER++ |       | $mbs$<br>$lr$<br>$bs$<br>$\alpha$<br>$\beta$ | [16, 64, 128]<br>[0.1, 0.2]<br>[1, 4, 8, 16]<br>[0.2, 0.5]<br>[0.5, 1.0] | GSS               | $lr$  | [0.03, 0.1]                                  |                                                                          | HAL  | $nb$ |     | [1]                                          | DER                                                                      | $mbs$<br>$lr$<br>$bs$<br>$\alpha$<br>$\beta$ | [16, 64, 128]<br>[0.1, 0.2]<br>[1, 4, 8, 16]<br>[0.2, 0.5]<br>[0.5, 1.0] |       | $gmbs$                                       | [10]                                                                     |       | DER                                          | $lr$                                                                     | [0.01, 0.03, 0.1] | DER++ |     | $mbs$<br>$lr$<br>$bs$<br>$\alpha$<br>$\beta$ | [16, 64, 128]<br>[0.1, 0.2]<br>[1, 4, 8, 16]<br>[0.2, 0.5]<br>[0.5, 1.0] |       | $nb$                                         | [1]                                                                      |           | DER  | $\lambda$        |     | [0.1, 0.5] | DER++           |       | $mbs$<br>$lr$<br>$bs$<br>$\alpha$<br>$\beta$ | [16, 64, 128]<br>[0.1, 0.2]<br>[1, 4, 8, 16]<br>[0.2, 0.5]<br>[0.5, 1.0] | HAL       | $lr$                                                                     |         | [0.03, 0.1, 0.2] | DER   |       | $\beta$                                      | [0.2, 0.3, 0.5]                                                          | DER++   | $mbs$<br>$lr$<br>$bs$<br>$\alpha$<br>$\beta$ |                                              | [16, 64, 128]<br>[0.1, 0.2]<br>[1, 4, 8, 16]<br>[0.2, 0.5]<br>[0.5, 1.0] | $\lambda$         |            | [0.1, 0.5]                                   | DER                                                                      | $\gamma$ | [0.1]           |       | DER++    | $mbs$<br>$lr$<br>$bs$<br>$\alpha$<br>$\beta$ |                                                                          | [16, 64, 128]<br>[0.1, 0.2]<br>[1, 4, 8, 16]<br>[0.2, 0.5]<br>[0.5, 1.0] | $\beta$                                                                  | [0.2, 0.5, 0.7] | DER  | $lr$        |       | [0.01, 0.03, 0.1] | DER++             |       | $mbs$<br>$lr$<br>$bs$<br>$\alpha$<br>$\beta$ | [16, 64, 128]<br>[0.1, 0.2]<br>[1, 4, 8, 16]<br>[0.2, 0.5]<br>[0.5, 1.0] | $\gamma$ | [0.1, 0.5]      |       | DER      | $\alpha$        |                 | [0.2, 0.5, 1.0]                              | DER++                                                                    | $mbs$<br>$lr$<br>$bs$<br>$\alpha$<br>$\beta$ | [16, 64, 128]<br>[0.1, 0.2]<br>[1, 4, 8, 16]<br>[0.2, 0.5]<br>[0.5, 1.0] | DER         |       | $lr$        | [0.03, 0.1] |         | DER++                                        | $lr$                                                                     | [0.01, 0.03, 0.1] | DER++           |                                              | $mbs$<br>$lr$<br>$bs$<br>$\alpha$<br>$\beta$                             | [16, 64, 128]<br>[0.1, 0.2]<br>[1, 4, 8, 16]<br>[0.2, 0.5]<br>[0.5, 1.0] |                 | $\alpha$                                     | [0.2, 0.5, 1.0]                                                          | DER++   | $\alpha$        |       | [0.1, 0.2, 0.5]                              | DER++      |                                                                          | $mbs$<br>$lr$<br>$bs$<br>$\alpha$<br>$\beta$ | [16, 64, 128]<br>[0.1, 0.2]<br>[1, 4, 8, 16]<br>[0.2, 0.5]<br>[0.5, 1.0] | DER++ | $lr$    |            | [0.03, 0.1] | DER++      |                                              | $\beta$                                                                  | [0.5, 1.0]                                                               |
|                  | $\xi$           | [0.9, 1.0]            |                     |                  |                            |           |                                         |                                                                      |                                                            |                                                                          |                                                                          |                                                                          |                                                                          |                                                                          |                                              |                   |                      |          |                 |     |                                         |                                                                      |       |                  |                   |         |                       |                                           |                   |                                   |                                                            |                 |     |                                         |                                                                      |       |                  |                   |       |                                              |                                                                          |     |                                   |                                                            |          |                                         |                                                                      |                                   |                                                            |                   |                   |       |                                              |      |                                                                          |                                                            |                                              |                                                                          |             |     |                                   |                                                            |       |                                              |                                                                          |                 |                                   |                                                            |          |          |                                              |                                                                          |                  |       |                                              |                                                                          |             |       |                                              |                                                                          |                                   |                                                            |                   |          |                                   |                                                            |       |                                   |                                                            |                                                                          |          |          |                            |       |                                              |                                                                          |                   |      |                                   |                                                            |       |                   |                   |                                   |                                                            |                                                                          |                            |             |                                              |                                                                          |                            |       |                                              |                                                                          |     |      |                   |             |      |                                              |      |                                                                          |                                                                          |                                              |                                                                          |        |       |       |                                              |                                                                          |                   |       |                                              |                                                                          |      |      |     |                                              |                                                                          |                                              |                                                                          |       |                                              |                                                                          |       |                                              |                                                                          |                   |       |     |                                              |                                                                          |       |                                              |                                                                          |           |      |                  |     |            |                 |       |                                              |                                                                          |           |                                                                          |         |                  |       |       |                                              |                                                                          |         |                                              |                                              |                                                                          |                   |            |                                              |                                                                          |          |                 |       |          |                                              |                                                                          |                                                                          |                                                                          |                 |      |             |       |                   |                   |       |                                              |                                                                          |          |                 |       |          |                 |                 |                                              |                                                                          |                                              |                                                                          |             |       |             |             |         |                                              |                                                                          |                   |                 |                                              |                                                                          |                                                                          |                 |                                              |                                                                          |         |                 |       |                                              |            |                                                                          |                                              |                                                                          |       |         |            |             |            |                                              |                                                                          |                                                                          |
| LwF              | $lr$            | [0.01, 0.03, 0.1]     | LwF                 | $lr$             | [0.01, 0.03, 0.1]          | A-GEM-R   |                                         | $mbs$<br>$lr$<br>$bs$                                                | [16, 64, 128]<br>[0.1, 0.2]<br>[1, 4, 16]                  |                                                                          |                                                                          |                                                                          |                                                                          |                                                                          |                                              |                   |                      |          |                 |     |                                         |                                                                      |       |                  |                   |         |                       |                                           |                   |                                   |                                                            |                 |     |                                         |                                                                      |       |                  |                   |       |                                              |                                                                          |     |                                   |                                                            |          |                                         |                                                                      |                                   |                                                            |                   |                   |       |                                              |      |                                                                          |                                                            |                                              |                                                                          |             |     |                                   |                                                            |       |                                              |                                                                          |                 |                                   |                                                            |          |          |                                              |                                                                          |                  |       |                                              |                                                                          |             |       |                                              |                                                                          |                                   |                                                            |                   |          |                                   |                                                            |       |                                   |                                                            |                                                                          |          |          |                            |       |                                              |                                                                          |                   |      |                                   |                                                            |       |                   |                   |                                   |                                                            |                                                                          |                            |             |                                              |                                                                          |                            |       |                                              |                                                                          |     |      |                   |             |      |                                              |      |                                                                          |                                                                          |                                              |                                                                          |        |       |       |                                              |                                                                          |                   |       |                                              |                                                                          |      |      |     |                                              |                                                                          |                                              |                                                                          |       |                                              |                                                                          |       |                                              |                                                                          |                   |       |     |                                              |                                                                          |       |                                              |                                                                          |           |      |                  |     |            |                 |       |                                              |                                                                          |           |                                                                          |         |                  |       |       |                                              |                                                                          |         |                                              |                                              |                                                                          |                   |            |                                              |                                                                          |          |                 |       |          |                                              |                                                                          |                                                                          |                                                                          |                 |      |             |       |                   |                   |       |                                              |                                                                          |          |                 |       |          |                 |                 |                                              |                                                                          |                                              |                                                                          |             |       |             |             |         |                                              |                                                                          |                   |                 |                                              |                                                                          |                                                                          |                 |                                              |                                                                          |         |                 |       |                                              |            |                                                                          |                                              |                                                                          |       |         |            |             |            |                                              |                                                                          |                                                                          |
|                  | $\alpha$        | [0.3, 0.5, 0.7, 1.0]  |                     | $\alpha$         | [0.3, 1, 3, 10]            |           | $T$                                     | [2.0, 4.0]                                                           | $T$                                                        | [2.0]                                                                    | $\gamma$<br>$nb$                                                         | [1.0]<br>[1]                                                             |                                                                          | PNN                                                                      | $lr$                                         | [0.01, 0.03, 0.1] | PNN                  | $lr$     | [0.03, 0.1]     | GSS | $mbs$<br>$lr$<br>$bs$<br>$gmbs$<br>$nb$ | [16, 64, 128]<br>[0.1, 0.2]<br>[1, 4, 8, 16]<br>[16, 64, 128]<br>[1] | ER    | $lr$             | [0.03, 0.01, 0.1] | ER      | $lr$                  | [0.01, 0.03, 0.1]                         | DER               | $mbs$<br>$lr$<br>$bs$<br>$\alpha$ | [16, 64, 128]<br>[0.1, 0.2]<br>[1, 4, 8, 16]<br>[0.5, 1.0] | MER             |     | $lr$                                    | [0.03, 0.1]                                                          | GEM   | $lr$             | [0.01, 0.03, 0.1] | DER++ | $mbs$<br>$lr$<br>$bs$<br>$\alpha$<br>$\beta$ | [16, 64, 128]<br>[0.1, 0.2]<br>[1, 4, 8, 16]<br>[0.2, 0.5]<br>[0.5, 1.0] |     | $\beta, \gamma$                   | [1.0]                                                      | $\gamma$ | [0.5, 1]                                | DER                                                                  | $mbs$<br>$lr$<br>$bs$<br>$\alpha$ | [16, 64, 128]<br>[0.1, 0.2]<br>[1, 4, 8, 16]<br>[0.5, 1.0] | $nb$              | [1]               |       | A-GEM                                        | $lr$ | [0.03, 0.1]                                                              | DER++                                                      | $mbs$<br>$lr$<br>$bs$<br>$\alpha$<br>$\beta$ | [16, 64, 128]<br>[0.1, 0.2]<br>[1, 4, 8, 16]<br>[0.2, 0.5]<br>[0.5, 1.0] | GEM         |     | $lr$                              | [0.01, 0.03, 0.1]                                          | iCaRL | $lr$                                         | [0.01, 0.03, 0.1]                                                        | DER             | $mbs$<br>$lr$<br>$bs$<br>$\alpha$ | [16, 64, 128]<br>[0.1, 0.2]<br>[1, 4, 8, 16]<br>[0.5, 1.0] |          | $\gamma$ | [0.5, 1]                                     | $wd$                                                                     | [0.0001, 0.0005] | DER++ | $mbs$<br>$lr$<br>$bs$<br>$\alpha$<br>$\beta$ | [16, 64, 128]<br>[0.1, 0.2]<br>[1, 4, 8, 16]<br>[0.2, 0.5]<br>[0.5, 1.0] | A-GEM       | $lr$  | [0.03, 0.1]                                  |                                                                          | FDR                               | $lr$                                                       | [0.01, 0.03, 0.1] | DER      | $mbs$<br>$lr$<br>$bs$<br>$\alpha$ | [16, 64, 128]<br>[0.1, 0.2]<br>[1, 4, 8, 16]<br>[0.5, 1.0] | iCaRL |                                   | $lr$                                                       | [0.03, 0.1]                                                              | GSS      | $\alpha$ | [0.03, 0.1, 0.3, 1.0, 3.0] | DER++ | $mbs$<br>$lr$<br>$bs$<br>$\alpha$<br>$\beta$ | [16, 64, 128]<br>[0.1, 0.2]<br>[1, 4, 8, 16]<br>[0.2, 0.5]<br>[0.5, 1.0] | FDR               |      | $lr$                              | [0.03, 0.1]                                                | HAL   | $lr$              | [0.01, 0.03, 0.1] | DER                               | $mbs$<br>$lr$<br>$bs$<br>$\alpha$<br>$\beta$               | [16, 64, 128]<br>[0.1, 0.2]<br>[1, 4, 8, 16]<br>[0.2, 0.5]<br>[0.5, 1.0] | $\alpha$                   |             | [0.2, 0.5, 1.0]                              | $gmbs$                                                                   | [32]                       | DER++ | $mbs$<br>$lr$<br>$bs$<br>$\alpha$<br>$\beta$ | [16, 64, 128]<br>[0.1, 0.2]<br>[1, 4, 8, 16]<br>[0.2, 0.5]<br>[0.5, 1.0] |     | GSS  | $lr$              | [0.03, 0.1] |      | HAL                                          | $nb$ | [1]                                                                      | DER                                                                      | $mbs$<br>$lr$<br>$bs$<br>$\alpha$<br>$\beta$ | [16, 64, 128]<br>[0.1, 0.2]<br>[1, 4, 8, 16]<br>[0.2, 0.5]<br>[0.5, 1.0] | $gmbs$ |       | [10]  | DER                                          | $lr$                                                                     | [0.01, 0.03, 0.1] | DER++ | $mbs$<br>$lr$<br>$bs$<br>$\alpha$<br>$\beta$ | [16, 64, 128]<br>[0.1, 0.2]<br>[1, 4, 8, 16]<br>[0.2, 0.5]<br>[0.5, 1.0] |      | $nb$ | [1] | DER                                          |                                                                          | $\lambda$                                    | [0.1, 0.5]                                                               | DER++ | $mbs$<br>$lr$<br>$bs$<br>$\alpha$<br>$\beta$ | [16, 64, 128]<br>[0.1, 0.2]<br>[1, 4, 8, 16]<br>[0.2, 0.5]<br>[0.5, 1.0] | HAL   |                                              | $lr$                                                                     | [0.03, 0.1, 0.2]  |       | DER | $\beta$                                      | [0.2, 0.3, 0.5]                                                          | DER++ | $mbs$<br>$lr$<br>$bs$<br>$\alpha$<br>$\beta$ | [16, 64, 128]<br>[0.1, 0.2]<br>[1, 4, 8, 16]<br>[0.2, 0.5]<br>[0.5, 1.0] | $\lambda$ |      | [0.1, 0.5]       | DER | $\gamma$   |                 | [0.1] | DER++                                        | $mbs$<br>$lr$<br>$bs$<br>$\alpha$<br>$\beta$                             |           | [16, 64, 128]<br>[0.1, 0.2]<br>[1, 4, 8, 16]<br>[0.2, 0.5]<br>[0.5, 1.0] | $\beta$ | [0.2, 0.5, 0.7]  |       | DER   | $lr$                                         | [0.01, 0.03, 0.1]                                                        |         | DER++                                        | $mbs$<br>$lr$<br>$bs$<br>$\alpha$<br>$\beta$ | [16, 64, 128]<br>[0.1, 0.2]<br>[1, 4, 8, 16]<br>[0.2, 0.5]<br>[0.5, 1.0] | $\gamma$          | [0.1, 0.5] | DER                                          |                                                                          | $\alpha$ | [0.2, 0.5, 1.0] | DER++ |          | $mbs$<br>$lr$<br>$bs$<br>$\alpha$<br>$\beta$ | [16, 64, 128]<br>[0.1, 0.2]<br>[1, 4, 8, 16]<br>[0.2, 0.5]<br>[0.5, 1.0] | DER                                                                      | $lr$                                                                     | [0.03, 0.1]     |      | DER++       | $lr$  | [0.01, 0.03, 0.1] |                   | DER++ | $mbs$<br>$lr$<br>$bs$<br>$\alpha$<br>$\beta$ | [16, 64, 128]<br>[0.1, 0.2]<br>[1, 4, 8, 16]<br>[0.2, 0.5]<br>[0.5, 1.0] | $\alpha$ | [0.2, 0.5, 1.0] | DER++ |          | $\alpha$        | [0.1, 0.2, 0.5] | DER++                                        |                                                                          | $mbs$<br>$lr$<br>$bs$<br>$\alpha$<br>$\beta$ | [16, 64, 128]<br>[0.1, 0.2]<br>[1, 4, 8, 16]<br>[0.2, 0.5]<br>[0.5, 1.0] | DER++       | $lr$  | [0.03, 0.1] | DER++       | $\beta$ |                                              | [0.5, 1.0]                                                               | DER++             |                 | $mbs$<br>$lr$<br>$bs$<br>$\alpha$<br>$\beta$ | [16, 64, 128]<br>[0.1, 0.2]<br>[1, 4, 8, 16]<br>[0.2, 0.5]<br>[0.5, 1.0] | $\alpha$                                                                 | [0.2, 0.5, 1.0] | DER++                                        | $\beta$                                                                  |         | [0.5, 1.0]      | DER++ | $mbs$<br>$lr$<br>$bs$<br>$\alpha$<br>$\beta$ |            | [16, 64, 128]<br>[0.1, 0.2]<br>[1, 4, 8, 16]<br>[0.2, 0.5]<br>[0.5, 1.0] | $\beta$                                      | [0.2, 0.5, 1.0]                                                          | DER++ | $\beta$ | [0.5, 1.0] | DER++       |            | $mbs$<br>$lr$<br>$bs$<br>$\alpha$<br>$\beta$ | [16, 64, 128]<br>[0.1, 0.2]<br>[1, 4, 8, 16]<br>[0.2, 0.5]<br>[0.5, 1.0] |                                                                          |
|                  | $\alpha$        | [0.3, 1, 3, 10]       |                     |                  |                            |           |                                         |                                                                      |                                                            |                                                                          |                                                                          |                                                                          |                                                                          |                                                                          |                                              |                   |                      |          |                 |     |                                         |                                                                      |       |                  |                   |         |                       |                                           |                   |                                   |                                                            |                 |     |                                         |                                                                      |       |                  |                   |       |                                              |                                                                          |     |                                   |                                                            |          |                                         |                                                                      |                                   |                                                            |                   |                   |       |                                              |      |                                                                          |                                                            |                                              |                                                                          |             |     |                                   |                                                            |       |                                              |                                                                          |                 |                                   |                                                            |          |          |                                              |                                                                          |                  |       |                                              |                                                                          |             |       |                                              |                                                                          |                                   |                                                            |                   |          |                                   |                                                            |       |                                   |                                                            |                                                                          |          |          |                            |       |                                              |                                                                          |                   |      |                                   |                                                            |       |                   |                   |                                   |                                                            |                                                                          |                            |             |                                              |                                                                          |                            |       |                                              |                                                                          |     |      |                   |             |      |                                              |      |                                                                          |                                                                          |                                              |                                                                          |        |       |       |                                              |                                                                          |                   |       |                                              |                                                                          |      |      |     |                                              |                                                                          |                                              |                                                                          |       |                                              |                                                                          |       |                                              |                                                                          |                   |       |     |                                              |                                                                          |       |                                              |                                                                          |           |      |                  |     |            |                 |       |                                              |                                                                          |           |                                                                          |         |                  |       |       |                                              |                                                                          |         |                                              |                                              |                                                                          |                   |            |                                              |                                                                          |          |                 |       |          |                                              |                                                                          |                                                                          |                                                                          |                 |      |             |       |                   |                   |       |                                              |                                                                          |          |                 |       |          |                 |                 |                                              |                                                                          |                                              |                                                                          |             |       |             |             |         |                                              |                                                                          |                   |                 |                                              |                                                                          |                                                                          |                 |                                              |                                                                          |         |                 |       |                                              |            |                                                                          |                                              |                                                                          |       |         |            |             |            |                                              |                                                                          |                                                                          |
| $T$              | [2.0, 4.0]      | $T$                   | [2.0]               | $\gamma$<br>$nb$ | [1.0]<br>[1]               |           |                                         |                                                                      |                                                            |                                                                          |                                                                          |                                                                          |                                                                          |                                                                          |                                              |                   |                      |          |                 |     |                                         |                                                                      |       |                  |                   |         |                       |                                           |                   |                                   |                                                            |                 |     |                                         |                                                                      |       |                  |                   |       |                                              |                                                                          |     |                                   |                                                            |          |                                         |                                                                      |                                   |                                                            |                   |                   |       |                                              |      |                                                                          |                                                            |                                              |                                                                          |             |     |                                   |                                                            |       |                                              |                                                                          |                 |                                   |                                                            |          |          |                                              |                                                                          |                  |       |                                              |                                                                          |             |       |                                              |                                                                          |                                   |                                                            |                   |          |                                   |                                                            |       |                                   |                                                            |                                                                          |          |          |                            |       |                                              |                                                                          |                   |      |                                   |                                                            |       |                   |                   |                                   |                                                            |                                                                          |                            |             |                                              |                                                                          |                            |       |                                              |                                                                          |     |      |                   |             |      |                                              |      |                                                                          |                                                                          |                                              |                                                                          |        |       |       |                                              |                                                                          |                   |       |                                              |                                                                          |      |      |     |                                              |                                                                          |                                              |                                                                          |       |                                              |                                                                          |       |                                              |                                                                          |                   |       |     |                                              |                                                                          |       |                                              |                                                                          |           |      |                  |     |            |                 |       |                                              |                                                                          |           |                                                                          |         |                  |       |       |                                              |                                                                          |         |                                              |                                              |                                                                          |                   |            |                                              |                                                                          |          |                 |       |          |                                              |                                                                          |                                                                          |                                                                          |                 |      |             |       |                   |                   |       |                                              |                                                                          |          |                 |       |          |                 |                 |                                              |                                                                          |                                              |                                                                          |             |       |             |             |         |                                              |                                                                          |                   |                 |                                              |                                                                          |                                                                          |                 |                                              |                                                                          |         |                 |       |                                              |            |                                                                          |                                              |                                                                          |       |         |            |             |            |                                              |                                                                          |                                                                          |
| PNN              | $lr$            | [0.01, 0.03, 0.1]     | PNN                 | $lr$             | [0.03, 0.1]                | GSS       | $mbs$<br>$lr$<br>$bs$<br>$gmbs$<br>$nb$ | [16, 64, 128]<br>[0.1, 0.2]<br>[1, 4, 8, 16]<br>[16, 64, 128]<br>[1] |                                                            |                                                                          |                                                                          |                                                                          |                                                                          |                                                                          |                                              |                   |                      |          |                 |     |                                         |                                                                      |       |                  |                   |         |                       |                                           |                   |                                   |                                                            |                 |     |                                         |                                                                      |       |                  |                   |       |                                              |                                                                          |     |                                   |                                                            |          |                                         |                                                                      |                                   |                                                            |                   |                   |       |                                              |      |                                                                          |                                                            |                                              |                                                                          |             |     |                                   |                                                            |       |                                              |                                                                          |                 |                                   |                                                            |          |          |                                              |                                                                          |                  |       |                                              |                                                                          |             |       |                                              |                                                                          |                                   |                                                            |                   |          |                                   |                                                            |       |                                   |                                                            |                                                                          |          |          |                            |       |                                              |                                                                          |                   |      |                                   |                                                            |       |                   |                   |                                   |                                                            |                                                                          |                            |             |                                              |                                                                          |                            |       |                                              |                                                                          |     |      |                   |             |      |                                              |      |                                                                          |                                                                          |                                              |                                                                          |        |       |       |                                              |                                                                          |                   |       |                                              |                                                                          |      |      |     |                                              |                                                                          |                                              |                                                                          |       |                                              |                                                                          |       |                                              |                                                                          |                   |       |     |                                              |                                                                          |       |                                              |                                                                          |           |      |                  |     |            |                 |       |                                              |                                                                          |           |                                                                          |         |                  |       |       |                                              |                                                                          |         |                                              |                                              |                                                                          |                   |            |                                              |                                                                          |          |                 |       |          |                                              |                                                                          |                                                                          |                                                                          |                 |      |             |       |                   |                   |       |                                              |                                                                          |          |                 |       |          |                 |                 |                                              |                                                                          |                                              |                                                                          |             |       |             |             |         |                                              |                                                                          |                   |                 |                                              |                                                                          |                                                                          |                 |                                              |                                                                          |         |                 |       |                                              |            |                                                                          |                                              |                                                                          |       |         |            |             |            |                                              |                                                                          |                                                                          |
| ER               | $lr$            | [0.03, 0.01, 0.1]     | ER                  | $lr$             | [0.01, 0.03, 0.1]          |           | DER                                     | $mbs$<br>$lr$<br>$bs$<br>$\alpha$                                    | [16, 64, 128]<br>[0.1, 0.2]<br>[1, 4, 8, 16]<br>[0.5, 1.0] |                                                                          |                                                                          |                                                                          |                                                                          |                                                                          |                                              |                   |                      |          |                 |     |                                         |                                                                      |       |                  |                   |         |                       |                                           |                   |                                   |                                                            |                 |     |                                         |                                                                      |       |                  |                   |       |                                              |                                                                          |     |                                   |                                                            |          |                                         |                                                                      |                                   |                                                            |                   |                   |       |                                              |      |                                                                          |                                                            |                                              |                                                                          |             |     |                                   |                                                            |       |                                              |                                                                          |                 |                                   |                                                            |          |          |                                              |                                                                          |                  |       |                                              |                                                                          |             |       |                                              |                                                                          |                                   |                                                            |                   |          |                                   |                                                            |       |                                   |                                                            |                                                                          |          |          |                            |       |                                              |                                                                          |                   |      |                                   |                                                            |       |                   |                   |                                   |                                                            |                                                                          |                            |             |                                              |                                                                          |                            |       |                                              |                                                                          |     |      |                   |             |      |                                              |      |                                                                          |                                                                          |                                              |                                                                          |        |       |       |                                              |                                                                          |                   |       |                                              |                                                                          |      |      |     |                                              |                                                                          |                                              |                                                                          |       |                                              |                                                                          |       |                                              |                                                                          |                   |       |     |                                              |                                                                          |       |                                              |                                                                          |           |      |                  |     |            |                 |       |                                              |                                                                          |           |                                                                          |         |                  |       |       |                                              |                                                                          |         |                                              |                                              |                                                                          |                   |            |                                              |                                                                          |          |                 |       |          |                                              |                                                                          |                                                                          |                                                                          |                 |      |             |       |                   |                   |       |                                              |                                                                          |          |                 |       |          |                 |                 |                                              |                                                                          |                                              |                                                                          |             |       |             |             |         |                                              |                                                                          |                   |                 |                                              |                                                                          |                                                                          |                 |                                              |                                                                          |         |                 |       |                                              |            |                                                                          |                                              |                                                                          |       |         |            |             |            |                                              |                                                                          |                                                                          |
| MER              | $lr$            | [0.03, 0.1]           | GEM                 | $lr$             | [0.01, 0.03, 0.1]          |           |                                         | DER++                                                                | $mbs$<br>$lr$<br>$bs$<br>$\alpha$<br>$\beta$               | [16, 64, 128]<br>[0.1, 0.2]<br>[1, 4, 8, 16]<br>[0.2, 0.5]<br>[0.5, 1.0] |                                                                          |                                                                          |                                                                          |                                                                          |                                              |                   |                      |          |                 |     |                                         |                                                                      |       |                  |                   |         |                       |                                           |                   |                                   |                                                            |                 |     |                                         |                                                                      |       |                  |                   |       |                                              |                                                                          |     |                                   |                                                            |          |                                         |                                                                      |                                   |                                                            |                   |                   |       |                                              |      |                                                                          |                                                            |                                              |                                                                          |             |     |                                   |                                                            |       |                                              |                                                                          |                 |                                   |                                                            |          |          |                                              |                                                                          |                  |       |                                              |                                                                          |             |       |                                              |                                                                          |                                   |                                                            |                   |          |                                   |                                                            |       |                                   |                                                            |                                                                          |          |          |                            |       |                                              |                                                                          |                   |      |                                   |                                                            |       |                   |                   |                                   |                                                            |                                                                          |                            |             |                                              |                                                                          |                            |       |                                              |                                                                          |     |      |                   |             |      |                                              |      |                                                                          |                                                                          |                                              |                                                                          |        |       |       |                                              |                                                                          |                   |       |                                              |                                                                          |      |      |     |                                              |                                                                          |                                              |                                                                          |       |                                              |                                                                          |       |                                              |                                                                          |                   |       |     |                                              |                                                                          |       |                                              |                                                                          |           |      |                  |     |            |                 |       |                                              |                                                                          |           |                                                                          |         |                  |       |       |                                              |                                                                          |         |                                              |                                              |                                                                          |                   |            |                                              |                                                                          |          |                 |       |          |                                              |                                                                          |                                                                          |                                                                          |                 |      |             |       |                   |                   |       |                                              |                                                                          |          |                 |       |          |                 |                 |                                              |                                                                          |                                              |                                                                          |             |       |             |             |         |                                              |                                                                          |                   |                 |                                              |                                                                          |                                                                          |                 |                                              |                                                                          |         |                 |       |                                              |            |                                                                          |                                              |                                                                          |       |         |            |             |            |                                              |                                                                          |                                                                          |
|                  | $\beta, \gamma$ | [1.0]                 |                     | $\gamma$         | [0.5, 1]                   |           |                                         |                                                                      | DER                                                        | $mbs$<br>$lr$<br>$bs$<br>$\alpha$                                        | [16, 64, 128]<br>[0.1, 0.2]<br>[1, 4, 8, 16]<br>[0.5, 1.0]               |                                                                          |                                                                          |                                                                          |                                              |                   |                      |          |                 |     |                                         |                                                                      |       |                  |                   |         |                       |                                           |                   |                                   |                                                            |                 |     |                                         |                                                                      |       |                  |                   |       |                                              |                                                                          |     |                                   |                                                            |          |                                         |                                                                      |                                   |                                                            |                   |                   |       |                                              |      |                                                                          |                                                            |                                              |                                                                          |             |     |                                   |                                                            |       |                                              |                                                                          |                 |                                   |                                                            |          |          |                                              |                                                                          |                  |       |                                              |                                                                          |             |       |                                              |                                                                          |                                   |                                                            |                   |          |                                   |                                                            |       |                                   |                                                            |                                                                          |          |          |                            |       |                                              |                                                                          |                   |      |                                   |                                                            |       |                   |                   |                                   |                                                            |                                                                          |                            |             |                                              |                                                                          |                            |       |                                              |                                                                          |     |      |                   |             |      |                                              |      |                                                                          |                                                                          |                                              |                                                                          |        |       |       |                                              |                                                                          |                   |       |                                              |                                                                          |      |      |     |                                              |                                                                          |                                              |                                                                          |       |                                              |                                                                          |       |                                              |                                                                          |                   |       |     |                                              |                                                                          |       |                                              |                                                                          |           |      |                  |     |            |                 |       |                                              |                                                                          |           |                                                                          |         |                  |       |       |                                              |                                                                          |         |                                              |                                              |                                                                          |                   |            |                                              |                                                                          |          |                 |       |          |                                              |                                                                          |                                                                          |                                                                          |                 |      |             |       |                   |                   |       |                                              |                                                                          |          |                 |       |          |                 |                 |                                              |                                                                          |                                              |                                                                          |             |       |             |             |         |                                              |                                                                          |                   |                 |                                              |                                                                          |                                                                          |                 |                                              |                                                                          |         |                 |       |                                              |            |                                                                          |                                              |                                                                          |       |         |            |             |            |                                              |                                                                          |                                                                          |
|                  | $nb$            | [1]                   | A-GEM               | $lr$             | [0.03, 0.1]                | DER++     |                                         |                                                                      |                                                            | $mbs$<br>$lr$<br>$bs$<br>$\alpha$<br>$\beta$                             | [16, 64, 128]<br>[0.1, 0.2]<br>[1, 4, 8, 16]<br>[0.2, 0.5]<br>[0.5, 1.0] |                                                                          |                                                                          |                                                                          |                                              |                   |                      |          |                 |     |                                         |                                                                      |       |                  |                   |         |                       |                                           |                   |                                   |                                                            |                 |     |                                         |                                                                      |       |                  |                   |       |                                              |                                                                          |     |                                   |                                                            |          |                                         |                                                                      |                                   |                                                            |                   |                   |       |                                              |      |                                                                          |                                                            |                                              |                                                                          |             |     |                                   |                                                            |       |                                              |                                                                          |                 |                                   |                                                            |          |          |                                              |                                                                          |                  |       |                                              |                                                                          |             |       |                                              |                                                                          |                                   |                                                            |                   |          |                                   |                                                            |       |                                   |                                                            |                                                                          |          |          |                            |       |                                              |                                                                          |                   |      |                                   |                                                            |       |                   |                   |                                   |                                                            |                                                                          |                            |             |                                              |                                                                          |                            |       |                                              |                                                                          |     |      |                   |             |      |                                              |      |                                                                          |                                                                          |                                              |                                                                          |        |       |       |                                              |                                                                          |                   |       |                                              |                                                                          |      |      |     |                                              |                                                                          |                                              |                                                                          |       |                                              |                                                                          |       |                                              |                                                                          |                   |       |     |                                              |                                                                          |       |                                              |                                                                          |           |      |                  |     |            |                 |       |                                              |                                                                          |           |                                                                          |         |                  |       |       |                                              |                                                                          |         |                                              |                                              |                                                                          |                   |            |                                              |                                                                          |          |                 |       |          |                                              |                                                                          |                                                                          |                                                                          |                 |      |             |       |                   |                   |       |                                              |                                                                          |          |                 |       |          |                 |                 |                                              |                                                                          |                                              |                                                                          |             |       |             |             |         |                                              |                                                                          |                   |                 |                                              |                                                                          |                                                                          |                 |                                              |                                                                          |         |                 |       |                                              |            |                                                                          |                                              |                                                                          |       |         |            |             |            |                                              |                                                                          |                                                                          |
| GEM              | $lr$            | [0.01, 0.03, 0.1]     | iCaRL               | $lr$             | [0.01, 0.03, 0.1]          |           | DER                                     |                                                                      |                                                            | $mbs$<br>$lr$<br>$bs$<br>$\alpha$                                        | [16, 64, 128]<br>[0.1, 0.2]<br>[1, 4, 8, 16]<br>[0.5, 1.0]               |                                                                          |                                                                          |                                                                          |                                              |                   |                      |          |                 |     |                                         |                                                                      |       |                  |                   |         |                       |                                           |                   |                                   |                                                            |                 |     |                                         |                                                                      |       |                  |                   |       |                                              |                                                                          |     |                                   |                                                            |          |                                         |                                                                      |                                   |                                                            |                   |                   |       |                                              |      |                                                                          |                                                            |                                              |                                                                          |             |     |                                   |                                                            |       |                                              |                                                                          |                 |                                   |                                                            |          |          |                                              |                                                                          |                  |       |                                              |                                                                          |             |       |                                              |                                                                          |                                   |                                                            |                   |          |                                   |                                                            |       |                                   |                                                            |                                                                          |          |          |                            |       |                                              |                                                                          |                   |      |                                   |                                                            |       |                   |                   |                                   |                                                            |                                                                          |                            |             |                                              |                                                                          |                            |       |                                              |                                                                          |     |      |                   |             |      |                                              |      |                                                                          |                                                                          |                                              |                                                                          |        |       |       |                                              |                                                                          |                   |       |                                              |                                                                          |      |      |     |                                              |                                                                          |                                              |                                                                          |       |                                              |                                                                          |       |                                              |                                                                          |                   |       |     |                                              |                                                                          |       |                                              |                                                                          |           |      |                  |     |            |                 |       |                                              |                                                                          |           |                                                                          |         |                  |       |       |                                              |                                                                          |         |                                              |                                              |                                                                          |                   |            |                                              |                                                                          |          |                 |       |          |                                              |                                                                          |                                                                          |                                                                          |                 |      |             |       |                   |                   |       |                                              |                                                                          |          |                 |       |          |                 |                 |                                              |                                                                          |                                              |                                                                          |             |       |             |             |         |                                              |                                                                          |                   |                 |                                              |                                                                          |                                                                          |                 |                                              |                                                                          |         |                 |       |                                              |            |                                                                          |                                              |                                                                          |       |         |            |             |            |                                              |                                                                          |                                                                          |
|                  | $\gamma$        | [0.5, 1]              |                     | $wd$             | [0.0001, 0.0005]           |           |                                         |                                                                      |                                                            | DER++                                                                    | $mbs$<br>$lr$<br>$bs$<br>$\alpha$<br>$\beta$                             | [16, 64, 128]<br>[0.1, 0.2]<br>[1, 4, 8, 16]<br>[0.2, 0.5]<br>[0.5, 1.0] |                                                                          |                                                                          |                                              |                   |                      |          |                 |     |                                         |                                                                      |       |                  |                   |         |                       |                                           |                   |                                   |                                                            |                 |     |                                         |                                                                      |       |                  |                   |       |                                              |                                                                          |     |                                   |                                                            |          |                                         |                                                                      |                                   |                                                            |                   |                   |       |                                              |      |                                                                          |                                                            |                                              |                                                                          |             |     |                                   |                                                            |       |                                              |                                                                          |                 |                                   |                                                            |          |          |                                              |                                                                          |                  |       |                                              |                                                                          |             |       |                                              |                                                                          |                                   |                                                            |                   |          |                                   |                                                            |       |                                   |                                                            |                                                                          |          |          |                            |       |                                              |                                                                          |                   |      |                                   |                                                            |       |                   |                   |                                   |                                                            |                                                                          |                            |             |                                              |                                                                          |                            |       |                                              |                                                                          |     |      |                   |             |      |                                              |      |                                                                          |                                                                          |                                              |                                                                          |        |       |       |                                              |                                                                          |                   |       |                                              |                                                                          |      |      |     |                                              |                                                                          |                                              |                                                                          |       |                                              |                                                                          |       |                                              |                                                                          |                   |       |     |                                              |                                                                          |       |                                              |                                                                          |           |      |                  |     |            |                 |       |                                              |                                                                          |           |                                                                          |         |                  |       |       |                                              |                                                                          |         |                                              |                                              |                                                                          |                   |            |                                              |                                                                          |          |                 |       |          |                                              |                                                                          |                                                                          |                                                                          |                 |      |             |       |                   |                   |       |                                              |                                                                          |          |                 |       |          |                 |                 |                                              |                                                                          |                                              |                                                                          |             |       |             |             |         |                                              |                                                                          |                   |                 |                                              |                                                                          |                                                                          |                 |                                              |                                                                          |         |                 |       |                                              |            |                                                                          |                                              |                                                                          |       |         |            |             |            |                                              |                                                                          |                                                                          |
| A-GEM            | $lr$            | [0.03, 0.1]           | FDR                 | $lr$             | [0.01, 0.03, 0.1]          |           |                                         | DER                                                                  | $mbs$<br>$lr$<br>$bs$<br>$\alpha$                          |                                                                          | [16, 64, 128]<br>[0.1, 0.2]<br>[1, 4, 8, 16]<br>[0.5, 1.0]               |                                                                          |                                                                          |                                                                          |                                              |                   |                      |          |                 |     |                                         |                                                                      |       |                  |                   |         |                       |                                           |                   |                                   |                                                            |                 |     |                                         |                                                                      |       |                  |                   |       |                                              |                                                                          |     |                                   |                                                            |          |                                         |                                                                      |                                   |                                                            |                   |                   |       |                                              |      |                                                                          |                                                            |                                              |                                                                          |             |     |                                   |                                                            |       |                                              |                                                                          |                 |                                   |                                                            |          |          |                                              |                                                                          |                  |       |                                              |                                                                          |             |       |                                              |                                                                          |                                   |                                                            |                   |          |                                   |                                                            |       |                                   |                                                            |                                                                          |          |          |                            |       |                                              |                                                                          |                   |      |                                   |                                                            |       |                   |                   |                                   |                                                            |                                                                          |                            |             |                                              |                                                                          |                            |       |                                              |                                                                          |     |      |                   |             |      |                                              |      |                                                                          |                                                                          |                                              |                                                                          |        |       |       |                                              |                                                                          |                   |       |                                              |                                                                          |      |      |     |                                              |                                                                          |                                              |                                                                          |       |                                              |                                                                          |       |                                              |                                                                          |                   |       |     |                                              |                                                                          |       |                                              |                                                                          |           |      |                  |     |            |                 |       |                                              |                                                                          |           |                                                                          |         |                  |       |       |                                              |                                                                          |         |                                              |                                              |                                                                          |                   |            |                                              |                                                                          |          |                 |       |          |                                              |                                                                          |                                                                          |                                                                          |                 |      |             |       |                   |                   |       |                                              |                                                                          |          |                 |       |          |                 |                 |                                              |                                                                          |                                              |                                                                          |             |       |             |             |         |                                              |                                                                          |                   |                 |                                              |                                                                          |                                                                          |                 |                                              |                                                                          |         |                 |       |                                              |            |                                                                          |                                              |                                                                          |       |         |            |             |            |                                              |                                                                          |                                                                          |
| iCaRL            | $lr$            | [0.03, 0.1]           | GSS                 | $\alpha$         | [0.03, 0.1, 0.3, 1.0, 3.0] | DER++     |                                         |                                                                      | $mbs$<br>$lr$<br>$bs$<br>$\alpha$<br>$\beta$               |                                                                          | [16, 64, 128]<br>[0.1, 0.2]<br>[1, 4, 8, 16]<br>[0.2, 0.5]<br>[0.5, 1.0] |                                                                          |                                                                          |                                                                          |                                              |                   |                      |          |                 |     |                                         |                                                                      |       |                  |                   |         |                       |                                           |                   |                                   |                                                            |                 |     |                                         |                                                                      |       |                  |                   |       |                                              |                                                                          |     |                                   |                                                            |          |                                         |                                                                      |                                   |                                                            |                   |                   |       |                                              |      |                                                                          |                                                            |                                              |                                                                          |             |     |                                   |                                                            |       |                                              |                                                                          |                 |                                   |                                                            |          |          |                                              |                                                                          |                  |       |                                              |                                                                          |             |       |                                              |                                                                          |                                   |                                                            |                   |          |                                   |                                                            |       |                                   |                                                            |                                                                          |          |          |                            |       |                                              |                                                                          |                   |      |                                   |                                                            |       |                   |                   |                                   |                                                            |                                                                          |                            |             |                                              |                                                                          |                            |       |                                              |                                                                          |     |      |                   |             |      |                                              |      |                                                                          |                                                                          |                                              |                                                                          |        |       |       |                                              |                                                                          |                   |       |                                              |                                                                          |      |      |     |                                              |                                                                          |                                              |                                                                          |       |                                              |                                                                          |       |                                              |                                                                          |                   |       |     |                                              |                                                                          |       |                                              |                                                                          |           |      |                  |     |            |                 |       |                                              |                                                                          |           |                                                                          |         |                  |       |       |                                              |                                                                          |         |                                              |                                              |                                                                          |                   |            |                                              |                                                                          |          |                 |       |          |                                              |                                                                          |                                                                          |                                                                          |                 |      |             |       |                   |                   |       |                                              |                                                                          |          |                 |       |          |                 |                 |                                              |                                                                          |                                              |                                                                          |             |       |             |             |         |                                              |                                                                          |                   |                 |                                              |                                                                          |                                                                          |                 |                                              |                                                                          |         |                 |       |                                              |            |                                                                          |                                              |                                                                          |       |         |            |             |            |                                              |                                                                          |                                                                          |
| FDR              | $lr$            | [0.03, 0.1]           |                     | HAL              | $lr$                       |           | [0.01, 0.03, 0.1]                       |                                                                      | DER                                                        |                                                                          | $mbs$<br>$lr$<br>$bs$<br>$\alpha$<br>$\beta$                             | [16, 64, 128]<br>[0.1, 0.2]<br>[1, 4, 8, 16]<br>[0.2, 0.5]<br>[0.5, 1.0] |                                                                          |                                                                          |                                              |                   |                      |          |                 |     |                                         |                                                                      |       |                  |                   |         |                       |                                           |                   |                                   |                                                            |                 |     |                                         |                                                                      |       |                  |                   |       |                                              |                                                                          |     |                                   |                                                            |          |                                         |                                                                      |                                   |                                                            |                   |                   |       |                                              |      |                                                                          |                                                            |                                              |                                                                          |             |     |                                   |                                                            |       |                                              |                                                                          |                 |                                   |                                                            |          |          |                                              |                                                                          |                  |       |                                              |                                                                          |             |       |                                              |                                                                          |                                   |                                                            |                   |          |                                   |                                                            |       |                                   |                                                            |                                                                          |          |          |                            |       |                                              |                                                                          |                   |      |                                   |                                                            |       |                   |                   |                                   |                                                            |                                                                          |                            |             |                                              |                                                                          |                            |       |                                              |                                                                          |     |      |                   |             |      |                                              |      |                                                                          |                                                                          |                                              |                                                                          |        |       |       |                                              |                                                                          |                   |       |                                              |                                                                          |      |      |     |                                              |                                                                          |                                              |                                                                          |       |                                              |                                                                          |       |                                              |                                                                          |                   |       |     |                                              |                                                                          |       |                                              |                                                                          |           |      |                  |     |            |                 |       |                                              |                                                                          |           |                                                                          |         |                  |       |       |                                              |                                                                          |         |                                              |                                              |                                                                          |                   |            |                                              |                                                                          |          |                 |       |          |                                              |                                                                          |                                                                          |                                                                          |                 |      |             |       |                   |                   |       |                                              |                                                                          |          |                 |       |          |                 |                 |                                              |                                                                          |                                              |                                                                          |             |       |             |             |         |                                              |                                                                          |                   |                 |                                              |                                                                          |                                                                          |                 |                                              |                                                                          |         |                 |       |                                              |            |                                                                          |                                              |                                                                          |       |         |            |             |            |                                              |                                                                          |                                                                          |
|                  | $\alpha$        | [0.2, 0.5, 1.0]       | $gmbs$              |                  | [32]                       |           | DER++                                   |                                                                      |                                                            | $mbs$<br>$lr$<br>$bs$<br>$\alpha$<br>$\beta$                             | [16, 64, 128]<br>[0.1, 0.2]<br>[1, 4, 8, 16]<br>[0.2, 0.5]<br>[0.5, 1.0] |                                                                          |                                                                          |                                                                          |                                              |                   |                      |          |                 |     |                                         |                                                                      |       |                  |                   |         |                       |                                           |                   |                                   |                                                            |                 |     |                                         |                                                                      |       |                  |                   |       |                                              |                                                                          |     |                                   |                                                            |          |                                         |                                                                      |                                   |                                                            |                   |                   |       |                                              |      |                                                                          |                                                            |                                              |                                                                          |             |     |                                   |                                                            |       |                                              |                                                                          |                 |                                   |                                                            |          |          |                                              |                                                                          |                  |       |                                              |                                                                          |             |       |                                              |                                                                          |                                   |                                                            |                   |          |                                   |                                                            |       |                                   |                                                            |                                                                          |          |          |                            |       |                                              |                                                                          |                   |      |                                   |                                                            |       |                   |                   |                                   |                                                            |                                                                          |                            |             |                                              |                                                                          |                            |       |                                              |                                                                          |     |      |                   |             |      |                                              |      |                                                                          |                                                                          |                                              |                                                                          |        |       |       |                                              |                                                                          |                   |       |                                              |                                                                          |      |      |     |                                              |                                                                          |                                              |                                                                          |       |                                              |                                                                          |       |                                              |                                                                          |                   |       |     |                                              |                                                                          |       |                                              |                                                                          |           |      |                  |     |            |                 |       |                                              |                                                                          |           |                                                                          |         |                  |       |       |                                              |                                                                          |         |                                              |                                              |                                                                          |                   |            |                                              |                                                                          |          |                 |       |          |                                              |                                                                          |                                                                          |                                                                          |                 |      |             |       |                   |                   |       |                                              |                                                                          |          |                 |       |          |                 |                 |                                              |                                                                          |                                              |                                                                          |             |       |             |             |         |                                              |                                                                          |                   |                 |                                              |                                                                          |                                                                          |                 |                                              |                                                                          |         |                 |       |                                              |            |                                                                          |                                              |                                                                          |       |         |            |             |            |                                              |                                                                          |                                                                          |
| GSS              | $lr$            | [0.03, 0.1]           | HAL                 |                  | $nb$                       |           |                                         | [1]                                                                  |                                                            | DER                                                                      | $mbs$<br>$lr$<br>$bs$<br>$\alpha$<br>$\beta$                             | [16, 64, 128]<br>[0.1, 0.2]<br>[1, 4, 8, 16]<br>[0.2, 0.5]<br>[0.5, 1.0] |                                                                          |                                                                          |                                              |                   |                      |          |                 |     |                                         |                                                                      |       |                  |                   |         |                       |                                           |                   |                                   |                                                            |                 |     |                                         |                                                                      |       |                  |                   |       |                                              |                                                                          |     |                                   |                                                            |          |                                         |                                                                      |                                   |                                                            |                   |                   |       |                                              |      |                                                                          |                                                            |                                              |                                                                          |             |     |                                   |                                                            |       |                                              |                                                                          |                 |                                   |                                                            |          |          |                                              |                                                                          |                  |       |                                              |                                                                          |             |       |                                              |                                                                          |                                   |                                                            |                   |          |                                   |                                                            |       |                                   |                                                            |                                                                          |          |          |                            |       |                                              |                                                                          |                   |      |                                   |                                                            |       |                   |                   |                                   |                                                            |                                                                          |                            |             |                                              |                                                                          |                            |       |                                              |                                                                          |     |      |                   |             |      |                                              |      |                                                                          |                                                                          |                                              |                                                                          |        |       |       |                                              |                                                                          |                   |       |                                              |                                                                          |      |      |     |                                              |                                                                          |                                              |                                                                          |       |                                              |                                                                          |       |                                              |                                                                          |                   |       |     |                                              |                                                                          |       |                                              |                                                                          |           |      |                  |     |            |                 |       |                                              |                                                                          |           |                                                                          |         |                  |       |       |                                              |                                                                          |         |                                              |                                              |                                                                          |                   |            |                                              |                                                                          |          |                 |       |          |                                              |                                                                          |                                                                          |                                                                          |                 |      |             |       |                   |                   |       |                                              |                                                                          |          |                 |       |          |                 |                 |                                              |                                                                          |                                              |                                                                          |             |       |             |             |         |                                              |                                                                          |                   |                 |                                              |                                                                          |                                                                          |                 |                                              |                                                                          |         |                 |       |                                              |            |                                                                          |                                              |                                                                          |       |         |            |             |            |                                              |                                                                          |                                                                          |
|                  | $gmbs$          | [10]                  |                     |                  | DER                        | $lr$      |                                         | [0.01, 0.03, 0.1]                                                    |                                                            |                                                                          | DER++                                                                    | $mbs$<br>$lr$<br>$bs$<br>$\alpha$<br>$\beta$                             | [16, 64, 128]<br>[0.1, 0.2]<br>[1, 4, 8, 16]<br>[0.2, 0.5]<br>[0.5, 1.0] |                                                                          |                                              |                   |                      |          |                 |     |                                         |                                                                      |       |                  |                   |         |                       |                                           |                   |                                   |                                                            |                 |     |                                         |                                                                      |       |                  |                   |       |                                              |                                                                          |     |                                   |                                                            |          |                                         |                                                                      |                                   |                                                            |                   |                   |       |                                              |      |                                                                          |                                                            |                                              |                                                                          |             |     |                                   |                                                            |       |                                              |                                                                          |                 |                                   |                                                            |          |          |                                              |                                                                          |                  |       |                                              |                                                                          |             |       |                                              |                                                                          |                                   |                                                            |                   |          |                                   |                                                            |       |                                   |                                                            |                                                                          |          |          |                            |       |                                              |                                                                          |                   |      |                                   |                                                            |       |                   |                   |                                   |                                                            |                                                                          |                            |             |                                              |                                                                          |                            |       |                                              |                                                                          |     |      |                   |             |      |                                              |      |                                                                          |                                                                          |                                              |                                                                          |        |       |       |                                              |                                                                          |                   |       |                                              |                                                                          |      |      |     |                                              |                                                                          |                                              |                                                                          |       |                                              |                                                                          |       |                                              |                                                                          |                   |       |     |                                              |                                                                          |       |                                              |                                                                          |           |      |                  |     |            |                 |       |                                              |                                                                          |           |                                                                          |         |                  |       |       |                                              |                                                                          |         |                                              |                                              |                                                                          |                   |            |                                              |                                                                          |          |                 |       |          |                                              |                                                                          |                                                                          |                                                                          |                 |      |             |       |                   |                   |       |                                              |                                                                          |          |                 |       |          |                 |                 |                                              |                                                                          |                                              |                                                                          |             |       |             |             |         |                                              |                                                                          |                   |                 |                                              |                                                                          |                                                                          |                 |                                              |                                                                          |         |                 |       |                                              |            |                                                                          |                                              |                                                                          |       |         |            |             |            |                                              |                                                                          |                                                                          |
|                  | $nb$            | [1]                   |                     | DER              |                            | $\lambda$ |                                         | [0.1, 0.5]                                                           | DER++                                                      |                                                                          |                                                                          | $mbs$<br>$lr$<br>$bs$<br>$\alpha$<br>$\beta$                             | [16, 64, 128]<br>[0.1, 0.2]<br>[1, 4, 8, 16]<br>[0.2, 0.5]<br>[0.5, 1.0] |                                                                          |                                              |                   |                      |          |                 |     |                                         |                                                                      |       |                  |                   |         |                       |                                           |                   |                                   |                                                            |                 |     |                                         |                                                                      |       |                  |                   |       |                                              |                                                                          |     |                                   |                                                            |          |                                         |                                                                      |                                   |                                                            |                   |                   |       |                                              |      |                                                                          |                                                            |                                              |                                                                          |             |     |                                   |                                                            |       |                                              |                                                                          |                 |                                   |                                                            |          |          |                                              |                                                                          |                  |       |                                              |                                                                          |             |       |                                              |                                                                          |                                   |                                                            |                   |          |                                   |                                                            |       |                                   |                                                            |                                                                          |          |          |                            |       |                                              |                                                                          |                   |      |                                   |                                                            |       |                   |                   |                                   |                                                            |                                                                          |                            |             |                                              |                                                                          |                            |       |                                              |                                                                          |     |      |                   |             |      |                                              |      |                                                                          |                                                                          |                                              |                                                                          |        |       |       |                                              |                                                                          |                   |       |                                              |                                                                          |      |      |     |                                              |                                                                          |                                              |                                                                          |       |                                              |                                                                          |       |                                              |                                                                          |                   |       |     |                                              |                                                                          |       |                                              |                                                                          |           |      |                  |     |            |                 |       |                                              |                                                                          |           |                                                                          |         |                  |       |       |                                              |                                                                          |         |                                              |                                              |                                                                          |                   |            |                                              |                                                                          |          |                 |       |          |                                              |                                                                          |                                                                          |                                                                          |                 |      |             |       |                   |                   |       |                                              |                                                                          |          |                 |       |          |                 |                 |                                              |                                                                          |                                              |                                                                          |             |       |             |             |         |                                              |                                                                          |                   |                 |                                              |                                                                          |                                                                          |                 |                                              |                                                                          |         |                 |       |                                              |            |                                                                          |                                              |                                                                          |       |         |            |             |            |                                              |                                                                          |                                                                          |
| HAL              | $lr$            | [0.03, 0.1, 0.2]      |                     |                  |                            | DER       | $\beta$                                 | [0.2, 0.3, 0.5]                                                      |                                                            |                                                                          |                                                                          | DER++                                                                    | $mbs$<br>$lr$<br>$bs$<br>$\alpha$<br>$\beta$                             | [16, 64, 128]<br>[0.1, 0.2]<br>[1, 4, 8, 16]<br>[0.2, 0.5]<br>[0.5, 1.0] |                                              |                   |                      |          |                 |     |                                         |                                                                      |       |                  |                   |         |                       |                                           |                   |                                   |                                                            |                 |     |                                         |                                                                      |       |                  |                   |       |                                              |                                                                          |     |                                   |                                                            |          |                                         |                                                                      |                                   |                                                            |                   |                   |       |                                              |      |                                                                          |                                                            |                                              |                                                                          |             |     |                                   |                                                            |       |                                              |                                                                          |                 |                                   |                                                            |          |          |                                              |                                                                          |                  |       |                                              |                                                                          |             |       |                                              |                                                                          |                                   |                                                            |                   |          |                                   |                                                            |       |                                   |                                                            |                                                                          |          |          |                            |       |                                              |                                                                          |                   |      |                                   |                                                            |       |                   |                   |                                   |                                                            |                                                                          |                            |             |                                              |                                                                          |                            |       |                                              |                                                                          |     |      |                   |             |      |                                              |      |                                                                          |                                                                          |                                              |                                                                          |        |       |       |                                              |                                                                          |                   |       |                                              |                                                                          |      |      |     |                                              |                                                                          |                                              |                                                                          |       |                                              |                                                                          |       |                                              |                                                                          |                   |       |     |                                              |                                                                          |       |                                              |                                                                          |           |      |                  |     |            |                 |       |                                              |                                                                          |           |                                                                          |         |                  |       |       |                                              |                                                                          |         |                                              |                                              |                                                                          |                   |            |                                              |                                                                          |          |                 |       |          |                                              |                                                                          |                                                                          |                                                                          |                 |      |             |       |                   |                   |       |                                              |                                                                          |          |                 |       |          |                 |                 |                                              |                                                                          |                                              |                                                                          |             |       |             |             |         |                                              |                                                                          |                   |                 |                                              |                                                                          |                                                                          |                 |                                              |                                                                          |         |                 |       |                                              |            |                                                                          |                                              |                                                                          |       |         |            |             |            |                                              |                                                                          |                                                                          |
|                  | $\lambda$       | [0.1, 0.5]            | DER                 |                  |                            |           | $\gamma$                                | [0.1]                                                                |                                                            | DER++                                                                    |                                                                          |                                                                          | $mbs$<br>$lr$<br>$bs$<br>$\alpha$<br>$\beta$                             | [16, 64, 128]<br>[0.1, 0.2]<br>[1, 4, 8, 16]<br>[0.2, 0.5]<br>[0.5, 1.0] |                                              |                   |                      |          |                 |     |                                         |                                                                      |       |                  |                   |         |                       |                                           |                   |                                   |                                                            |                 |     |                                         |                                                                      |       |                  |                   |       |                                              |                                                                          |     |                                   |                                                            |          |                                         |                                                                      |                                   |                                                            |                   |                   |       |                                              |      |                                                                          |                                                            |                                              |                                                                          |             |     |                                   |                                                            |       |                                              |                                                                          |                 |                                   |                                                            |          |          |                                              |                                                                          |                  |       |                                              |                                                                          |             |       |                                              |                                                                          |                                   |                                                            |                   |          |                                   |                                                            |       |                                   |                                                            |                                                                          |          |          |                            |       |                                              |                                                                          |                   |      |                                   |                                                            |       |                   |                   |                                   |                                                            |                                                                          |                            |             |                                              |                                                                          |                            |       |                                              |                                                                          |     |      |                   |             |      |                                              |      |                                                                          |                                                                          |                                              |                                                                          |        |       |       |                                              |                                                                          |                   |       |                                              |                                                                          |      |      |     |                                              |                                                                          |                                              |                                                                          |       |                                              |                                                                          |       |                                              |                                                                          |                   |       |     |                                              |                                                                          |       |                                              |                                                                          |           |      |                  |     |            |                 |       |                                              |                                                                          |           |                                                                          |         |                  |       |       |                                              |                                                                          |         |                                              |                                              |                                                                          |                   |            |                                              |                                                                          |          |                 |       |          |                                              |                                                                          |                                                                          |                                                                          |                 |      |             |       |                   |                   |       |                                              |                                                                          |          |                 |       |          |                 |                 |                                              |                                                                          |                                              |                                                                          |             |       |             |             |         |                                              |                                                                          |                   |                 |                                              |                                                                          |                                                                          |                 |                                              |                                                                          |         |                 |       |                                              |            |                                                                          |                                              |                                                                          |       |         |            |             |            |                                              |                                                                          |                                                                          |
|                  | $\beta$         | [0.2, 0.5, 0.7]       |                     |                  | DER                        |           | $lr$                                    | [0.01, 0.03, 0.1]                                                    |                                                            |                                                                          | DER++                                                                    |                                                                          | $mbs$<br>$lr$<br>$bs$<br>$\alpha$<br>$\beta$                             | [16, 64, 128]<br>[0.1, 0.2]<br>[1, 4, 8, 16]<br>[0.2, 0.5]<br>[0.5, 1.0] |                                              |                   |                      |          |                 |     |                                         |                                                                      |       |                  |                   |         |                       |                                           |                   |                                   |                                                            |                 |     |                                         |                                                                      |       |                  |                   |       |                                              |                                                                          |     |                                   |                                                            |          |                                         |                                                                      |                                   |                                                            |                   |                   |       |                                              |      |                                                                          |                                                            |                                              |                                                                          |             |     |                                   |                                                            |       |                                              |                                                                          |                 |                                   |                                                            |          |          |                                              |                                                                          |                  |       |                                              |                                                                          |             |       |                                              |                                                                          |                                   |                                                            |                   |          |                                   |                                                            |       |                                   |                                                            |                                                                          |          |          |                            |       |                                              |                                                                          |                   |      |                                   |                                                            |       |                   |                   |                                   |                                                            |                                                                          |                            |             |                                              |                                                                          |                            |       |                                              |                                                                          |     |      |                   |             |      |                                              |      |                                                                          |                                                                          |                                              |                                                                          |        |       |       |                                              |                                                                          |                   |       |                                              |                                                                          |      |      |     |                                              |                                                                          |                                              |                                                                          |       |                                              |                                                                          |       |                                              |                                                                          |                   |       |     |                                              |                                                                          |       |                                              |                                                                          |           |      |                  |     |            |                 |       |                                              |                                                                          |           |                                                                          |         |                  |       |       |                                              |                                                                          |         |                                              |                                              |                                                                          |                   |            |                                              |                                                                          |          |                 |       |          |                                              |                                                                          |                                                                          |                                                                          |                 |      |             |       |                   |                   |       |                                              |                                                                          |          |                 |       |          |                 |                 |                                              |                                                                          |                                              |                                                                          |             |       |             |             |         |                                              |                                                                          |                   |                 |                                              |                                                                          |                                                                          |                 |                                              |                                                                          |         |                 |       |                                              |            |                                                                          |                                              |                                                                          |       |         |            |             |            |                                              |                                                                          |                                                                          |
|                  | $\gamma$        | [0.1, 0.5]            |                     | DER              |                            |           | $\alpha$                                | [0.2, 0.5, 1.0]                                                      | DER++                                                      |                                                                          |                                                                          |                                                                          | $mbs$<br>$lr$<br>$bs$<br>$\alpha$<br>$\beta$                             | [16, 64, 128]<br>[0.1, 0.2]<br>[1, 4, 8, 16]<br>[0.2, 0.5]<br>[0.5, 1.0] |                                              |                   |                      |          |                 |     |                                         |                                                                      |       |                  |                   |         |                       |                                           |                   |                                   |                                                            |                 |     |                                         |                                                                      |       |                  |                   |       |                                              |                                                                          |     |                                   |                                                            |          |                                         |                                                                      |                                   |                                                            |                   |                   |       |                                              |      |                                                                          |                                                            |                                              |                                                                          |             |     |                                   |                                                            |       |                                              |                                                                          |                 |                                   |                                                            |          |          |                                              |                                                                          |                  |       |                                              |                                                                          |             |       |                                              |                                                                          |                                   |                                                            |                   |          |                                   |                                                            |       |                                   |                                                            |                                                                          |          |          |                            |       |                                              |                                                                          |                   |      |                                   |                                                            |       |                   |                   |                                   |                                                            |                                                                          |                            |             |                                              |                                                                          |                            |       |                                              |                                                                          |     |      |                   |             |      |                                              |      |                                                                          |                                                                          |                                              |                                                                          |        |       |       |                                              |                                                                          |                   |       |                                              |                                                                          |      |      |     |                                              |                                                                          |                                              |                                                                          |       |                                              |                                                                          |       |                                              |                                                                          |                   |       |     |                                              |                                                                          |       |                                              |                                                                          |           |      |                  |     |            |                 |       |                                              |                                                                          |           |                                                                          |         |                  |       |       |                                              |                                                                          |         |                                              |                                              |                                                                          |                   |            |                                              |                                                                          |          |                 |       |          |                                              |                                                                          |                                                                          |                                                                          |                 |      |             |       |                   |                   |       |                                              |                                                                          |          |                 |       |          |                 |                 |                                              |                                                                          |                                              |                                                                          |             |       |             |             |         |                                              |                                                                          |                   |                 |                                              |                                                                          |                                                                          |                 |                                              |                                                                          |         |                 |       |                                              |            |                                                                          |                                              |                                                                          |       |         |            |             |            |                                              |                                                                          |                                                                          |
| DER              | $lr$            | [0.03, 0.1]           |                     |                  |                            | DER++     | $lr$                                    | [0.01, 0.03, 0.1]                                                    |                                                            |                                                                          |                                                                          | DER++                                                                    | $mbs$<br>$lr$<br>$bs$<br>$\alpha$<br>$\beta$                             | [16, 64, 128]<br>[0.1, 0.2]<br>[1, 4, 8, 16]<br>[0.2, 0.5]<br>[0.5, 1.0] |                                              |                   |                      |          |                 |     |                                         |                                                                      |       |                  |                   |         |                       |                                           |                   |                                   |                                                            |                 |     |                                         |                                                                      |       |                  |                   |       |                                              |                                                                          |     |                                   |                                                            |          |                                         |                                                                      |                                   |                                                            |                   |                   |       |                                              |      |                                                                          |                                                            |                                              |                                                                          |             |     |                                   |                                                            |       |                                              |                                                                          |                 |                                   |                                                            |          |          |                                              |                                                                          |                  |       |                                              |                                                                          |             |       |                                              |                                                                          |                                   |                                                            |                   |          |                                   |                                                            |       |                                   |                                                            |                                                                          |          |          |                            |       |                                              |                                                                          |                   |      |                                   |                                                            |       |                   |                   |                                   |                                                            |                                                                          |                            |             |                                              |                                                                          |                            |       |                                              |                                                                          |     |      |                   |             |      |                                              |      |                                                                          |                                                                          |                                              |                                                                          |        |       |       |                                              |                                                                          |                   |       |                                              |                                                                          |      |      |     |                                              |                                                                          |                                              |                                                                          |       |                                              |                                                                          |       |                                              |                                                                          |                   |       |     |                                              |                                                                          |       |                                              |                                                                          |           |      |                  |     |            |                 |       |                                              |                                                                          |           |                                                                          |         |                  |       |       |                                              |                                                                          |         |                                              |                                              |                                                                          |                   |            |                                              |                                                                          |          |                 |       |          |                                              |                                                                          |                                                                          |                                                                          |                 |      |             |       |                   |                   |       |                                              |                                                                          |          |                 |       |          |                 |                 |                                              |                                                                          |                                              |                                                                          |             |       |             |             |         |                                              |                                                                          |                   |                 |                                              |                                                                          |                                                                          |                 |                                              |                                                                          |         |                 |       |                                              |            |                                                                          |                                              |                                                                          |       |         |            |             |            |                                              |                                                                          |                                                                          |
|                  | $\alpha$        | [0.2, 0.5, 1.0]       | DER++               |                  |                            |           | $\alpha$                                | [0.1, 0.2, 0.5]                                                      |                                                            | DER++                                                                    |                                                                          |                                                                          | $mbs$<br>$lr$<br>$bs$<br>$\alpha$<br>$\beta$                             | [16, 64, 128]<br>[0.1, 0.2]<br>[1, 4, 8, 16]<br>[0.2, 0.5]<br>[0.5, 1.0] |                                              |                   |                      |          |                 |     |                                         |                                                                      |       |                  |                   |         |                       |                                           |                   |                                   |                                                            |                 |     |                                         |                                                                      |       |                  |                   |       |                                              |                                                                          |     |                                   |                                                            |          |                                         |                                                                      |                                   |                                                            |                   |                   |       |                                              |      |                                                                          |                                                            |                                              |                                                                          |             |     |                                   |                                                            |       |                                              |                                                                          |                 |                                   |                                                            |          |          |                                              |                                                                          |                  |       |                                              |                                                                          |             |       |                                              |                                                                          |                                   |                                                            |                   |          |                                   |                                                            |       |                                   |                                                            |                                                                          |          |          |                            |       |                                              |                                                                          |                   |      |                                   |                                                            |       |                   |                   |                                   |                                                            |                                                                          |                            |             |                                              |                                                                          |                            |       |                                              |                                                                          |     |      |                   |             |      |                                              |      |                                                                          |                                                                          |                                              |                                                                          |        |       |       |                                              |                                                                          |                   |       |                                              |                                                                          |      |      |     |                                              |                                                                          |                                              |                                                                          |       |                                              |                                                                          |       |                                              |                                                                          |                   |       |     |                                              |                                                                          |       |                                              |                                                                          |           |      |                  |     |            |                 |       |                                              |                                                                          |           |                                                                          |         |                  |       |       |                                              |                                                                          |         |                                              |                                              |                                                                          |                   |            |                                              |                                                                          |          |                 |       |          |                                              |                                                                          |                                                                          |                                                                          |                 |      |             |       |                   |                   |       |                                              |                                                                          |          |                 |       |          |                 |                 |                                              |                                                                          |                                              |                                                                          |             |       |             |             |         |                                              |                                                                          |                   |                 |                                              |                                                                          |                                                                          |                 |                                              |                                                                          |         |                 |       |                                              |            |                                                                          |                                              |                                                                          |       |         |            |             |            |                                              |                                                                          |                                                                          |
| DER++            | $lr$            | [0.03, 0.1]           |                     |                  | DER++                      |           | $\beta$                                 | [0.5, 1.0]                                                           |                                                            |                                                                          | DER++                                                                    |                                                                          | $mbs$<br>$lr$<br>$bs$<br>$\alpha$<br>$\beta$                             | [16, 64, 128]<br>[0.1, 0.2]<br>[1, 4, 8, 16]<br>[0.2, 0.5]<br>[0.5, 1.0] |                                              |                   |                      |          |                 |     |                                         |                                                                      |       |                  |                   |         |                       |                                           |                   |                                   |                                                            |                 |     |                                         |                                                                      |       |                  |                   |       |                                              |                                                                          |     |                                   |                                                            |          |                                         |                                                                      |                                   |                                                            |                   |                   |       |                                              |      |                                                                          |                                                            |                                              |                                                                          |             |     |                                   |                                                            |       |                                              |                                                                          |                 |                                   |                                                            |          |          |                                              |                                                                          |                  |       |                                              |                                                                          |             |       |                                              |                                                                          |                                   |                                                            |                   |          |                                   |                                                            |       |                                   |                                                            |                                                                          |          |          |                            |       |                                              |                                                                          |                   |      |                                   |                                                            |       |                   |                   |                                   |                                                            |                                                                          |                            |             |                                              |                                                                          |                            |       |                                              |                                                                          |     |      |                   |             |      |                                              |      |                                                                          |                                                                          |                                              |                                                                          |        |       |       |                                              |                                                                          |                   |       |                                              |                                                                          |      |      |     |                                              |                                                                          |                                              |                                                                          |       |                                              |                                                                          |       |                                              |                                                                          |                   |       |     |                                              |                                                                          |       |                                              |                                                                          |           |      |                  |     |            |                 |       |                                              |                                                                          |           |                                                                          |         |                  |       |       |                                              |                                                                          |         |                                              |                                              |                                                                          |                   |            |                                              |                                                                          |          |                 |       |          |                                              |                                                                          |                                                                          |                                                                          |                 |      |             |       |                   |                   |       |                                              |                                                                          |          |                 |       |          |                 |                 |                                              |                                                                          |                                              |                                                                          |             |       |             |             |         |                                              |                                                                          |                   |                 |                                              |                                                                          |                                                                          |                 |                                              |                                                                          |         |                 |       |                                              |            |                                                                          |                                              |                                                                          |       |         |            |             |            |                                              |                                                                          |                                                                          |
|                  | $\alpha$        | [0.2, 0.5, 1.0]       |                     | DER++            |                            |           | $\beta$                                 | [0.5, 1.0]                                                           | DER++                                                      |                                                                          |                                                                          |                                                                          | $mbs$<br>$lr$<br>$bs$<br>$\alpha$<br>$\beta$                             | [16, 64, 128]<br>[0.1, 0.2]<br>[1, 4, 8, 16]<br>[0.2, 0.5]<br>[0.5, 1.0] |                                              |                   |                      |          |                 |     |                                         |                                                                      |       |                  |                   |         |                       |                                           |                   |                                   |                                                            |                 |     |                                         |                                                                      |       |                  |                   |       |                                              |                                                                          |     |                                   |                                                            |          |                                         |                                                                      |                                   |                                                            |                   |                   |       |                                              |      |                                                                          |                                                            |                                              |                                                                          |             |     |                                   |                                                            |       |                                              |                                                                          |                 |                                   |                                                            |          |          |                                              |                                                                          |                  |       |                                              |                                                                          |             |       |                                              |                                                                          |                                   |                                                            |                   |          |                                   |                                                            |       |                                   |                                                            |                                                                          |          |          |                            |       |                                              |                                                                          |                   |      |                                   |                                                            |       |                   |                   |                                   |                                                            |                                                                          |                            |             |                                              |                                                                          |                            |       |                                              |                                                                          |     |      |                   |             |      |                                              |      |                                                                          |                                                                          |                                              |                                                                          |        |       |       |                                              |                                                                          |                   |       |                                              |                                                                          |      |      |     |                                              |                                                                          |                                              |                                                                          |       |                                              |                                                                          |       |                                              |                                                                          |                   |       |     |                                              |                                                                          |       |                                              |                                                                          |           |      |                  |     |            |                 |       |                                              |                                                                          |           |                                                                          |         |                  |       |       |                                              |                                                                          |         |                                              |                                              |                                                                          |                   |            |                                              |                                                                          |          |                 |       |          |                                              |                                                                          |                                                                          |                                                                          |                 |      |             |       |                   |                   |       |                                              |                                                                          |          |                 |       |          |                 |                 |                                              |                                                                          |                                              |                                                                          |             |       |             |             |         |                                              |                                                                          |                   |                 |                                              |                                                                          |                                                                          |                 |                                              |                                                                          |         |                 |       |                                              |            |                                                                          |                                              |                                                                          |       |         |            |             |            |                                              |                                                                          |                                                                          |
|                  | $\beta$         | [0.2, 0.5, 1.0]       |                     |                  |                            | DER++     | $\beta$                                 | [0.5, 1.0]                                                           |                                                            |                                                                          |                                                                          | DER++                                                                    | $mbs$<br>$lr$<br>$bs$<br>$\alpha$<br>$\beta$                             | [16, 64, 128]<br>[0.1, 0.2]<br>[1, 4, 8, 16]<br>[0.2, 0.5]<br>[0.5, 1.0] |                                              |                   |                      |          |                 |     |                                         |                                                                      |       |                  |                   |         |                       |                                           |                   |                                   |                                                            |                 |     |                                         |                                                                      |       |                  |                   |       |                                              |                                                                          |     |                                   |                                                            |          |                                         |                                                                      |                                   |                                                            |                   |                   |       |                                              |      |                                                                          |                                                            |                                              |                                                                          |             |     |                                   |                                                            |       |                                              |                                                                          |                 |                                   |                                                            |          |          |                                              |                                                                          |                  |       |                                              |                                                                          |             |       |                                              |                                                                          |                                   |                                                            |                   |          |                                   |                                                            |       |                                   |                                                            |                                                                          |          |          |                            |       |                                              |                                                                          |                   |      |                                   |                                                            |       |                   |                   |                                   |                                                            |                                                                          |                            |             |                                              |                                                                          |                            |       |                                              |                                                                          |     |      |                   |             |      |                                              |      |                                                                          |                                                                          |                                              |                                                                          |        |       |       |                                              |                                                                          |                   |       |                                              |                                                                          |      |      |     |                                              |                                                                          |                                              |                                                                          |       |                                              |                                                                          |       |                                              |                                                                          |                   |       |     |                                              |                                                                          |       |                                              |                                                                          |           |      |                  |     |            |                 |       |                                              |                                                                          |           |                                                                          |         |                  |       |       |                                              |                                                                          |         |                                              |                                              |                                                                          |                   |            |                                              |                                                                          |          |                 |       |          |                                              |                                                                          |                                                                          |                                                                          |                 |      |             |       |                   |                   |       |                                              |                                                                          |          |                 |       |          |                 |                 |                                              |                                                                          |                                              |                                                                          |             |       |             |             |         |                                              |                                                                          |                   |                 |                                              |                                                                          |                                                                          |                 |                                              |                                                                          |         |                 |       |                                              |            |                                                                          |                                              |                                                                          |       |         |            |             |            |                                              |                                                                          |                                                                          |
|                  |                 | DER++                 | $\beta$             |                  |                            |           | [0.5, 1.0]                              | DER++                                                                |                                                            | $mbs$<br>$lr$<br>$bs$<br>$\alpha$<br>$\beta$                             |                                                                          |                                                                          | [16, 64, 128]<br>[0.1, 0.2]<br>[1, 4, 8, 16]<br>[0.2, 0.5]<br>[0.5, 1.0] |                                                                          |                                              |                   |                      |          |                 |     |                                         |                                                                      |       |                  |                   |         |                       |                                           |                   |                                   |                                                            |                 |     |                                         |                                                                      |       |                  |                   |       |                                              |                                                                          |     |                                   |                                                            |          |                                         |                                                                      |                                   |                                                            |                   |                   |       |                                              |      |                                                                          |                                                            |                                              |                                                                          |             |     |                                   |                                                            |       |                                              |                                                                          |                 |                                   |                                                            |          |          |                                              |                                                                          |                  |       |                                              |                                                                          |             |       |                                              |                                                                          |                                   |                                                            |                   |          |                                   |                                                            |       |                                   |                                                            |                                                                          |          |          |                            |       |                                              |                                                                          |                   |      |                                   |                                                            |       |                   |                   |                                   |                                                            |                                                                          |                            |             |                                              |                                                                          |                            |       |                                              |                                                                          |     |      |                   |             |      |                                              |      |                                                                          |                                                                          |                                              |                                                                          |        |       |       |                                              |                                                                          |                   |       |                                              |                                                                          |      |      |     |                                              |                                                                          |                                              |                                                                          |       |                                              |                                                                          |       |                                              |                                                                          |                   |       |     |                                              |                                                                          |       |                                              |                                                                          |           |      |                  |     |            |                 |       |                                              |                                                                          |           |                                                                          |         |                  |       |       |                                              |                                                                          |         |                                              |                                              |                                                                          |                   |            |                                              |                                                                          |          |                 |       |          |                                              |                                                                          |                                                                          |                                                                          |                 |      |             |       |                   |                   |       |                                              |                                                                          |          |                 |       |          |                 |                 |                                              |                                                                          |                                              |                                                                          |             |       |             |             |         |                                              |                                                                          |                   |                 |                                              |                                                                          |                                                                          |                 |                                              |                                                                          |         |                 |       |                                              |            |                                                                          |                                              |                                                                          |       |         |            |             |            |                                              |                                                                          |                                                                          |

Table 10: Hyperparameter space for Grid-Search

## References

- [1] Rahaf Aljundi, Min Lin, Baptiste Goujaud, and Yoshua Bengio. Gradient based sample selection for online continual learning. In *Advances in Neural Information Processing Systems*, 2019.
- [2] Arslan Chaudhry, Puneet K Dokania, Thalaiyasingam Ajanthan, and Philip HS Torr. Riemannian walk for incremental learning: Understanding forgetting and intransigence. In *Proceedings of the European Conference on Computer Vision*, 2018.
- [3] Arslan Chaudhry, Albert Gordo, Puneet K Dokania, Philip Torr, and David Lopez-Paz. Using hindsight to anchor past knowledge in continual learning. *arXiv preprint arXiv:2002.08165*, 2020.
- [4] Arslan Chaudhry, Marc’Aurelio Ranzato, Marcus Rohrbach, and Mohamed Elhoseiny. Efficient lifelong learning with a-gem. In *International Conference on Learning Representations*, 2019.
- [5] Arslan Chaudhry, Marcus Rohrbach, Mohamed Elhoseiny, Thalaiyasingam Ajanthan, Puneet K Dokania, Philip HS Torr, and Marc’Aurelio Ranzato. On tiny episodic memories in continual learning. *arXiv preprint arXiv:1902.10486*, 2019.
- [6] Matthias De Lange, Rahaf Aljundi, Marc Masana, Sarah Parisot, Xu Jia, Ales Leonardis, Gregory Slabaugh, and Tinne Tuytelaars. A continual learning survey: Defying forgetting in classification tasks. *arXiv preprint arXiv:1909.08383*, 2019.
- [7] David Lopez-Paz and Marc’Aurelio Ranzato. Gradient episodic memory for continual learning. In *Advances in Neural Information Processing Systems*, 2017.

- [8] Sylvestre-Alvise Rebuffi, Alexander Kolesnikov, Georg Sperl, and Christoph H Lampert. icarl: Incremental classifier and representation learning. In *Proceedings of the IEEE conference on Computer Vision and Pattern Recognition*, 2017.
- [9] Jeffrey S Vitter. Random sampling with a reservoir. *ACM Transactions on Mathematical Software (TOMS)*, 11(1):37–57, 1985.
